# Supplementary material for: The structure and function of P5A-ATPases
Source: PubMed Central journal article supplement (PMC11541931; doi:10.1038/s41467-024-53757-6), 2024-11-06
Supplement: 41467_2024_53757_MOESM1_ESM.pdf [file 41467_2024_53757_MOESM1_ESM.pdf]

## Supplementary Information for:

### The structure and function of P5A-ATPases

Ping Li<sup>1,†</sup>, Viktoria Bågenholm<sup>2</sup>, Per Hägglund<sup>2</sup>, Karin Lindkvist-Petersson<sup>1</sup>, Kaituo Wang<sup>2,3</sup>  
& Pontus Gourdon<sup>1,2,†</sup>

<sup>1</sup> Department of Experimental Medical Science, Lund University, Sölvegatan 19, SE-221 84 Lund, Sweden

<sup>2</sup> Department of Biomedical Sciences, University of Copenhagen, Nørre Allé 14, DK-2200 Copenhagen N, Denmark

<sup>3</sup> Current address: State Key Laboratory of Plant Diversity and Specialty Crops, Institute of Botany, Chinese Academy of Sciences, Beijing, China

† Correspondence should be addressed to: P.L. (ping.li@med.lu.se) or P.G. (pontus.gourdon@med.lu.se)

Supplementary Fig. 1

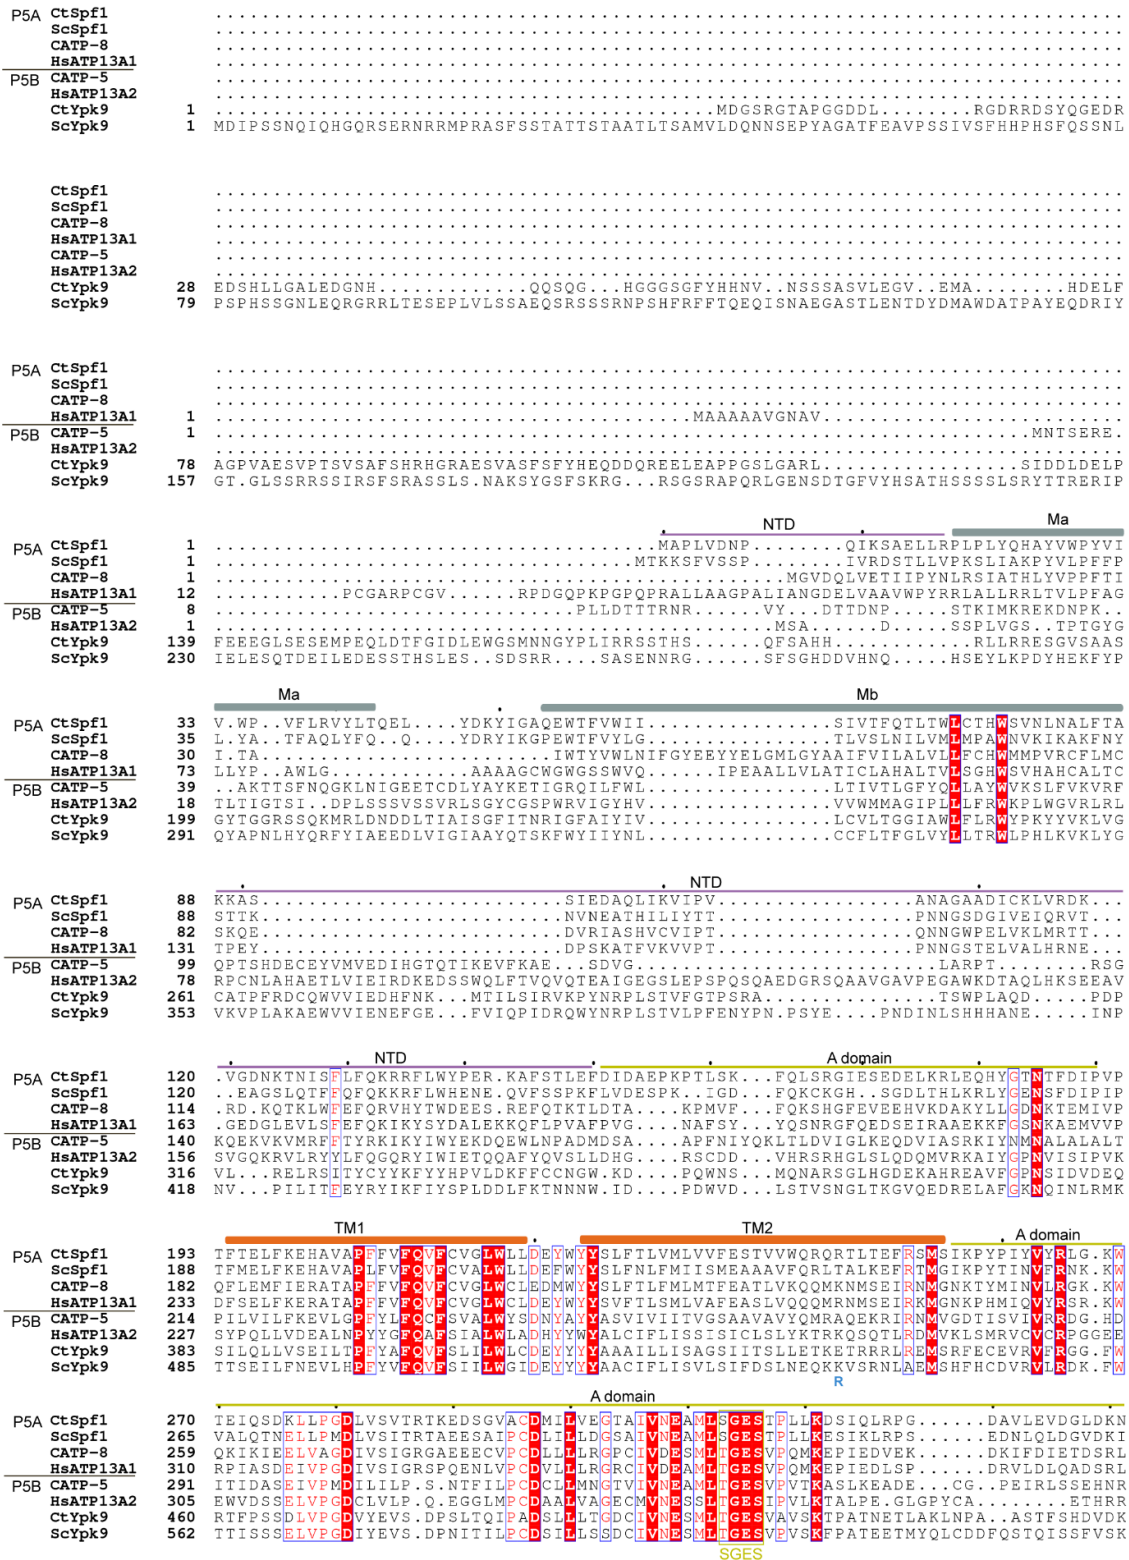

|     |           |      | A domain                                                                           | TM3                   |          |     |
|-----|-----------|------|------------------------------------------------------------------------------------|-----------------------|----------|-----|
| P5A | CtSpf1    | 342  | SIWGGTQKVLQITHGTAEEERPKPASGIPPPDNGAMAVVTKTGFETSQGGLVRRMIYSTERVSNANTEALLFLFL        |                       |          |     |
|     | ScSpf1    | 337  | AVLHGKAKALQVTP.....PEHKSDDIPPPDGGALAVVTKTGFETSQGGLVRRMIYSAERVSVDNKEALMFLFL         |                       |          |     |
|     | CATP-8    | 331  | HVIFGGKIVQHTAP.....GKAAEGMVKSPDGNICVVRRTGFNTSQGGLVRRMIFGVKKATANNLETFCLFLFL         |                       |          |     |
|     | HsATP13A1 | 362  | HVIFGGKIVQHTAP.....QKATITGL.KPVDVSGCVAVVLRRTGFNTSQGGLVRRMIFGVKKATANNLETFCLFLFL     |                       |          |     |
| P5B | CATP-5    | 382  | HTLFSGTVLQTRNYK.....GQPVMARVIRRTGFSTLKGGLVRRSIMYKPKQEKALKDVMVFLVLVGL               |                       |          |     |
|     | HsATP13A2 | 372  | HTLFCGKILIQARAYV.....GPHVLAVVIRRTGFCTAKGGVRSILHPRPINFKEYKHSMKVVAALLS               |                       |          |     |
|     | CtYpk9    | 535  | HFLYCGKLLIRARQLA.....DTEAAAVAVVIRRTGFNTTRGALVRSMLVVPKPKFKFYEDSFRYLKVMG             |                       |          |     |
|     | ScYpk9    | 639  | SFLYNGKNIIRARIAP.....GQTAALAVVIRRTGFSTTKGSLVRSMLVFPKPTGFKFYRDSFKYLGFM              |                       |          |     |
|     |           |      | TM3                                                                                | TM4                   | P domain |     |
| P5A | CtSpf1    | 420  | VFALAASWVWDEGVRR.DRKRKLLDCILITISVVPPELPMESLAVNTSLSAIAKFAIETBFRRIPFACRIDVA          |                       |          |     |
|     | ScSpf1    | 408  | IRAVIASWVWVEGTM.GRIQSKLIDCILITISVVPPELPMELTMAVNSSLAAIAKFAIETBFRRIPFACRIDVC         |                       |          |     |
|     | CATP-8    | 403  | IRAVIAAAALWIKGSVDSTRSKYKLFLECTLITISVVPPELPEISLAVNSSLMALQKLGIEICTBFRRIPFACRIDVC     |                       |          |     |
|     | HsATP13A1 | 453  | VFVIAAAAVVWIEGTDKPSRNRYKLFLECTLITISVVPPELPEISLAVNTSLIAIAKLYMYICTBFRRIPFACRIVEVC    |                       |          |     |
| P5B | CATP-5    | 424  | FIALIGFIYTVIEMVSR.GESLKHIIIRSLDIIITVVPPELPAAMSVGINANSRLKKKKIEICTBTNVNCGLINVA       |                       |          |     |
|     | HsATP13A2 | 434  | VIALLGFIYVIFILYRN.RVPLNEIVIRALDLITVVPPELPAAMTCTLYAQSR.LRQGLIEICTBRLINLNGEKQLQV     |                       |          |     |
|     | CtYpk9    | 601  | CIAGLAFIVSLVNFIRL.KLHWTLILRALDLITVVPPELPAATLTIGTSFAVQLKKGKIEICTBRLVNVGKIDLM        |                       |          |     |
|     | ScYpk9    | 702  | LIAIFGFCVSCVQFIKL.GLDKTKMIRALDLITVVPPELPAATLTIGTNFALSRLKKGKIEICTBRLNISGRIDVM       |                       |          |     |
|     |           |      | VPPELP                                                                             | K                     |          |     |
|     |           |      | P domain                                                                           | N domain              |          |     |
| P5A | CtSpf1    | 497  | CFDKKTGLTGEDVVEEIAAGLGLGHSG.....TDP.....KEA.....DGA.....HTRMVSVDHAGM               |                       |          |     |
|     | ScSpf1    | 485  | CFDKKTGLTGEDVVEECLAGISADSEN.....IR.....IR.....HLYSAEAEPE                           |                       |          |     |
|     | CATP-8    | 481  | CFDKKTGLTGDNDVVEEVALNNOKEGM.....IR.....IR.....NAEDLPH                              |                       |          |     |
|     | HsATP13A1 | 531  | CFDKKTGLTGDNDVVEEVVAVGLRDGK.E.....VT.....VT.....PVSSIPV                            |                       |          |     |
| P5B | CATP-5    | 501  | CFDKKTGLTGEDVDFNCLKAIKRNEDGKPEFSEFLELDPVKLS.....AENANL                             |                       |          |     |
|     | HsATP13A2 | 511  | CFDKKTGLTGEDVDFNCLKAIKRNEDGKPEFSEFLELDPVKLS.....AENANL                             |                       |          |     |
|     | CtYpk9    | 678  | CFDKKTGLTGEDVDFNCLKAIKRNEDGKPEFSEFLELDPVKLS.....AENANL                             |                       |          |     |
|     | ScYpk9    | 779  | CFDKKTGLTGEDVDFNCLKAIKRNEDGKPEFSEFLELDPVKLS.....AENANL                             |                       |          |     |
|     |           |      | DKTGT                                                                              |                       |          |     |
|     |           |      |                                                                                    |                       |          |     |
| P5A | CtSpf1    | 546  | ETTLVLAATAHALVKLDEGEIVGDPMEKATLNALGVLGKNDTLT.....SKPGN..                           |                       |          |     |
|     | ScSpf1    | 524  | STILVIGAAHALVKLEDGDIIVGDPMEKATLKAAGVAERKNSNY.....PKTA..                            |                       |          |     |
|     | CATP-8    | 517  | ESLQVLASCSLVRFEEDLIVGDPMEKALCSWGNLTKGDVAM.....PKTA..                               |                       |          |     |
|     | HsATP13A1 | 566  | ETHRALASCSLMLQDDGTLLVGDPEKAMLTAVDWTLLTKDEKVF.....PRSIK..                           |                       |          |     |
| P5B | CATP-5    | 551  | NIVVAAASCSLSTRIDG.TLVGDPELILVERKSWLIEEAVNSDEETQDF.....DTVOPTVLRPPEEQ..             |                       |          |     |
|     | HsATP13A2 | 550  | PLLRALATCSLHSLRLQG.TPVGDPEMLKMFVSTGWLLEEEPAADSAPF.....TQVLAAMRPLWLE.P              |                       |          |     |
|     | CtYpk9    | 752  | AALYVMASCSLRIVDG.VAVGDPELVKMFSTGWSVEEYGFIAEIVISTE.G.....RGDISPSTARPRYMTS           |                       |          |     |
|     | ScYpk9    | 838  | NFFMSLLTCSLRSVDG.NLIVGDPELVKMFQFTGWSFEEDFQKRAPHSLYGRHEDDVPFENSEIIPAVVHPDSNNRE      |                       |          |     |
|     |           |      | N domain                                                                           |                       |          |     |
| P5A | CtSpf1    | 595  | ...AASGGILGTQIKRRFQFSALIKRQESVATITATEVTKGRKLRGSEVGVKGAFFETIMKML..VTVPEHYEITYKVF    |                       |          |     |
|     | ScSpf1    | 568  | ...REGTKGLDIRRFQFSALIKRQESVATITATEVTKGRKLRGSEVGVKGAFFETIMKML..VTVPEHYEITYKVF       |                       |          |     |
|     | CATP-8    | 565  | ...AKGISGKIFHRYHFSSALIKRQESVATITATEVTKGRKLRGSEVGVKGAFFETIMKML..VTVPEHYEITYKVF      |                       |          |     |
|     | HsATP13A1 | 615  | ...T...OGLKIHQRHFSSALIKRQESVATITATEVTKGRKLRGSEVGVKGAFFETIMKML..VTVPEHYEITYKVF      |                       |          |     |
| P5B | CATP-5    | 614  | ...ATYHPENNEYSVIKQHFSSALIKRQESVATITATEVTKGRKLRGSEVGVKGAFFETIMKML..VTVPEHYEITYKVF   |                       |          |     |
|     | HsATP13A2 | 611  | ...QIQAEMEEPPVPSVLRHFSSALIKRQESVATITATEVTKGRKLRGSEVGVKGAFFETIMKML..VTVPEHYEITYKVF  |                       |          |     |
|     | CtYpk9    | 819  | ...QMSIGEAPPVAVGLRAFDFSSALIKRQESVATITATEVTKGRKLRGSEVGVKGAFFETIMKML..VTVPEHYEITYKVF |                       |          |     |
|     | ScYpk9    | 915  | ...NFTDNDPHNFLGVVRSDFSSALIKRQESVATITATEVTKGRKLRGSEVGVKGAFFETIMKML..VTVPEHYEITYKVF  |                       |          |     |
|     |           |      | N domain                                                                           | P domain              |          |     |
| P5A | CtSpf1    | 669  | RRRCSRVLAALAYRQITTEGELGANKINDLKRRESVADLHFAAGLVLQCFLEDAKQAVRMNNESSHRVMIITGDNPT      |                       |          |     |
|     | ScSpf1    | 629  | RRRCSRVLAALAYRQITTEGELGANKINDLKRRESVADLHFAAGLVLQCFLEDAKQAVRMNNESSHRVMIITGDNPT      |                       |          |     |
|     | CATP-8    | 632  | RRRCSRVLAALAYRQITTEGELGANKINDLKRRESVADLHFAAGLVLQCFLEDAKQAVRMNNESSHRVMIITGDNPT      |                       |          |     |
|     | HsATP13A1 | 679  | RRRCSRVLAALAYRQITTEGELGANKINDLKRRESVADLHFAAGLVLQCFLEDAKQAVRMNNESSHRVMIITGDNPT      |                       |          |     |
| P5B | CATP-5    | 685  | AQRGRLIIVASKAVHLN.F...AKALKTPRDIIMSELELGLLIVMENRLLKDVTLVSNELSVANIRCVYVITGDNLQT     |                       |          |     |
|     | HsATP13A2 | 681  | IAGGRVIALASKFLPTVPS..LEAAQQLTVDVGDLSLLGLLVMRNLKRPQTTPVQALRRTRIRAVYVITGDNLQT        |                       |          |     |
|     | CtYpk9    | 889  | HAGGRVIALASKFLPTVPS..LEAAQQLTVDVGDLSLLGLLVMRNLKRPQTTPVQALRRTRIRAVYVITGDNLQT        |                       |          |     |
|     | ScYpk9    | 985  | HNGGRVIALASKFLPTVPS..LEAAQQLTVDVGDLSLLGLLVMRNLKRPQTTPVQALRRTRIRAVYVITGDNLQT        |                       |          |     |
|     |           |      | P domain                                                                           |                       |          |     |
| P5A | CtSpf1    | 747  | AVHVAKEVEIVDRDVLILDAPHS.....VYGEESLVWRSVDDKIRIDVDPK.PI.....DPELTKTKD               |                       |          |     |
|     | ScSpf1    | 704  | AVHVAKEVEIVFGETLILDRAKGS.....DDNQLLFRDVEETVSIIPFPDPSK.DT.....FD.HSKLFDRYD          |                       |          |     |
|     | CATP-8    | 707  | ACHVSKVLFKTKSLPTLVLDDEPA.....DGVWMMKSVSDGTIELPLKPEP.KNK.....ME.RKAFNSHE            |                       |          |     |
|     | HsATP13A1 | 754  | ACHVAQELHFIKAHTLILQPPSE.....KGRQCEWRSIDGSIVLPLARGS.PK.....ALALEYA                  |                       |          |     |
| P5B | CATP-5    | 759  | AMSVARECGIIRPTKKAFLITHSKTEKDLGRTKLFIKESVSSSEND.IDTD.....SEVRAFDRKAVLRTATAY         |                       |          |     |
|     | HsATP13A2 | 757  | AVTVARGCGMVAPQEHLIVHAT..HPE.RGQPASLEFLPMSFTAV.....NGVKDDPQA.ASYT.VEPPDRSRH         |                       |          |     |
|     | CtYpk9    | 964  | AVSVARQCGIIEHACHYMPRFIEGNAD.DCNAK.LRWESINNFALB.LDPWTLMPFVPPQTDASLPDYDSNIRNYA       |                       |          |     |
|     | ScYpk9    | 1060 | AVSVAREAGLIQCS.RVYVPSIND.TPL.HGEPV.IVWRDVENFPDKI.LDKTKLKPVKLGNNSS.....ESLRECHYT    |                       |          |     |
|     |           |      | P domain                                                                           |                       |          |     |
| P5A | CtSpf1    | 806  | LCVTCYALNFKF.....GQVGVKSLRLRYTWVYARVSPKQKEDILLGLKDMGYTLMAAGDNDVYALKRQAHVGVALL      |                       |          |     |
|     | ScSpf1    | 763  | IAVTCYALNALE.....GHSQRLDLLRHTTWVYARVSPKQKEDILLGLKDMGYTLMAAGDNDVYALKRQAHVGVALL      |                       |          |     |
|     | CATP-8    | 767  | FCLTGSAPHHLVHN.....EHTFLRELILHVKVFYARMAPKQKEREINE.LKSLGKVTLMGGDNDVYALKRQAHVGVALL   |                       |          |     |
|     | HsATP13A1 | 809  | LCLTGDGLAHLQAT...DPQOQLRLIPHVQVYARMAPKQKEFVITS.LKELGVTLMGGDNDVYALKRQAHVGVALL       |                       |          |     |
| P5B | CATP-5    | 828  | MAIAGPTYSVITHE...YPELVDRITAMCDVYARMAPDQKAQLIGALQEI GARVSMGGDNDVYALKRQAHVGVALL      |                       |          |     |
|     | HsATP13A2 | 823  | LALSGLPTFGIIVKH...F.PKLLPKVVLVQGTVYARMAPDQKTELVCLEQLQYCVGMGGDNDVYALKRQAHVGVALL     |                       |          |     |
|     | CtYpk9    | 1039 | IAVGDFVFRVIVD...HAPTDLHRMLVLGKVIYARMSPEKQELVKKFQSIDYSCGFGGGDNDVYALKRQAHVGVALL      |                       |          |     |
|     | ScYpk9    | 1128 | LAVSGDFVFRLLFRDENEIPEEYLNNEILLNSSIYARMSPEKQELVKKFQSIDYSCGFGGGDNDVYALKRQAHVGVALL    |                       |          |     |
|     |           |      | plug domain                                                                        |                       |          |     |
| P5A | CtSpf1    | 878  | NGTQEDLNRIAEHTRNQKMKELYQKQVLDMARWGPPPPVPAIAHLYPPGPNPHYQKAMEREAKRGVTVTEQLAKV        |                       |          |     |
|     | ScSpf1    | 835  | NGTEGLKLLGQSRRLLEGKMMYIKQTEFMARWQPPPPVPEIAHLFPFGPKPNHYLKALESKGTVIPEIRK....         |                       |          |     |
|     | CATP-8    | 841  | TNPYDAEKAAEKE...KEKKAKIEEARSVLRSGAQLPQRPG.....APGAPPAANAARR.....                   |                       |          |     |
|     | HsATP13A1 | 883  | ANAPERVVERRR.....RPRDSPTLNSG.....IR.....                                           |                       |          |     |
| P5B | CATP-5    | 902  | Q.....                                                                             |                       |          |     |
|     | HsATP13A2 | 897  | Q.....                                                                             |                       |          |     |
|     | CtYpk9    | 1114 | E.....                                                                             |                       |          |     |
|     | ScYpk9    | 1206 | E.....                                                                             |                       |          |     |
|     |           |      | plug domain                                                                        | Modelled part of Plug | P domain | TM5 |
| P5A | CtSpf1    | 956  | NGTNTVSNFAGVQQSQDQAKKQVEAAKKAANFADKLTSSLMEAEMLDEPPTLKLGLASVAAFPPTSRLRNVAIPN        |                       |          |     |
|     | ScSpf1    | 909  | AVEEANSKPVVEVITKPNGLSFKK.....PADLASELLN.SAGDAQCEAPALKLGLASVAAFPPTSRLRNVAIPN        |                       |          |     |
|     | CATP-8    | 892  | .....DAPPGARARALPP.....MANA..AACHRLDNLKMLEEKEAQAQVTKLGLASVAAFPPTSRLRNVAIPN         |                       |          |     |
|     | HsATP13A1 | 903  | .....ATSRTAKORSGLPP.....SEEOPTSQDRLSOVLRLDLEDESTPIVKLGLASVAAFPPTSRLRNVAIPN         |                       |          |     |
| P5B | CATP-5    | 903  | .....                                                                              |                       |          |     |
|     | HsATP13A2 | 898  | .....                                                                              |                       |          |     |
|     | CtYpk9    | 1115 | .....                                                                              |                       |          |     |
|     | ScYpk9    | 1207 | .....                                                                              |                       |          |     |

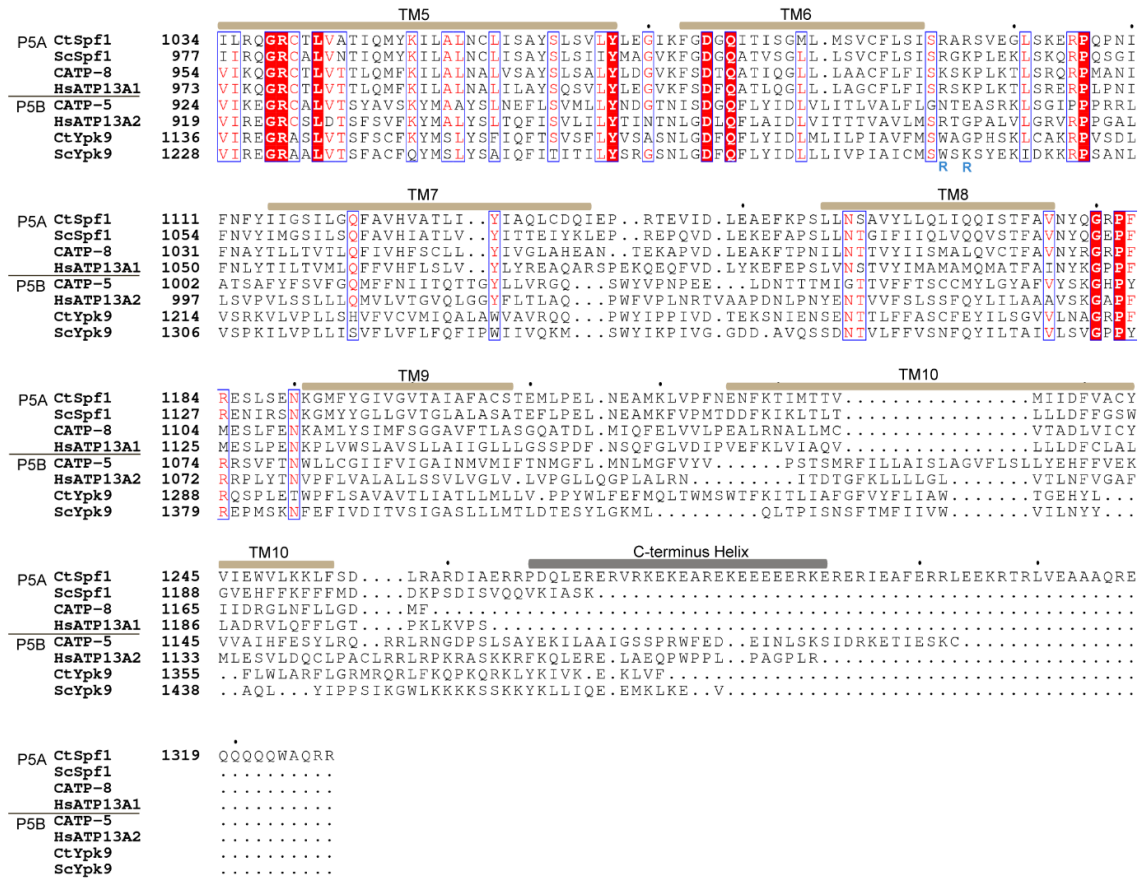

**Supplementary Fig. 1. Structure-based multiple sequence alignment of selected P5A and P5B ATPases.** The following sequences are included in the alignment (Uniprot ID in brackets) P5A: CtSpf1 (G0S4Z4), ScSpf1 (P39986), CATP-8 (P90747), HsATP13A1 (Q9HD20); P5B: CATP-5 (Q21286), HsATP13A2 (Q9NQ11), CtYpk9 (G0S7G9), ScYpk9 (Q12697). The alignment is annotated as follows: Purple line, NTD-domain (the soluble part). Yellow line, A-domain. Blue line, P-domain. Red line, N-domain. Gray cylinders, helices Ma and Mb. Orange cylinders, M1 and M2. Wheat cylinders, M3 to M10. Dark gray cylinder, C-terminal helix. Yellow box, conserved dephosphorylation loop (SGE). Blue box, conserved phosphorylation motif (DKTGT). Green box, Plug-domain. Wheat box, P5A conserved motif (PEELPM/IE) of M4. Positively charged residues (circled in blue), may contribute to cargo transport. Sequence alignments were performed using Cluster Omega (online) and visualized using ESPrpt 3.0 (online).

## Supplementary Fig. 2

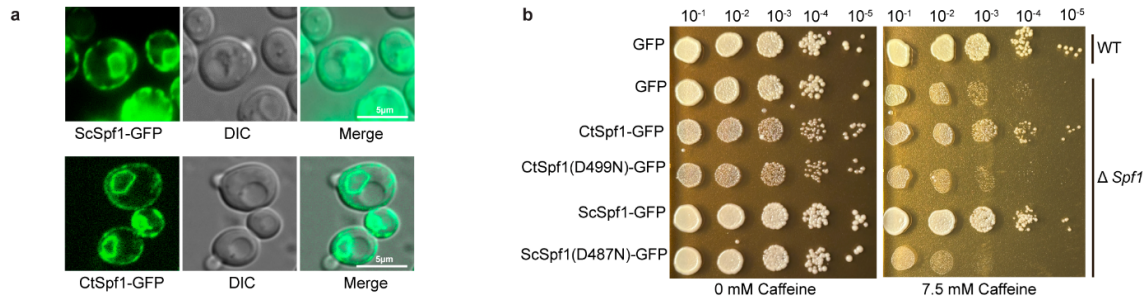

**Supplementary Fig. 2. Functional characterization of CtSpf1.** **a** Localization of CtSpf1 was investigated using fluorescence microscopy, comparing GFP-fluorescence (left), differential interference contrast (DIC) (middle) and merged (right), the scale bar represents 5  $\mu$ m. Imaging experiments were conducted for three separate clones of each yeast strain. **b** Comparison of the growth on YPdG-agar plates of *S. cerevisiae* cells with wild-type CtSpf1-GFP, inactive CtSpf1-GFP (the D499N mutant), wild-type ScSpf1-GFP and inactive ScSpf1-GFP (the D487N mutant equivalent to the D499N mutant in CtSpf1) in the absence (left) or presence of caffeine (7.5 mM, right). GFP only constructs represent controls using the same plasmid as used for the P5A-ATPase forms. The experiment were performed at 30 °C in wild-type (WT, first row) and ScSpf1-deleted (all rows except for the first) BY4741 yeast strains. The growth assay was performed three times independently with similar results.

### Supplementary Fig. 3

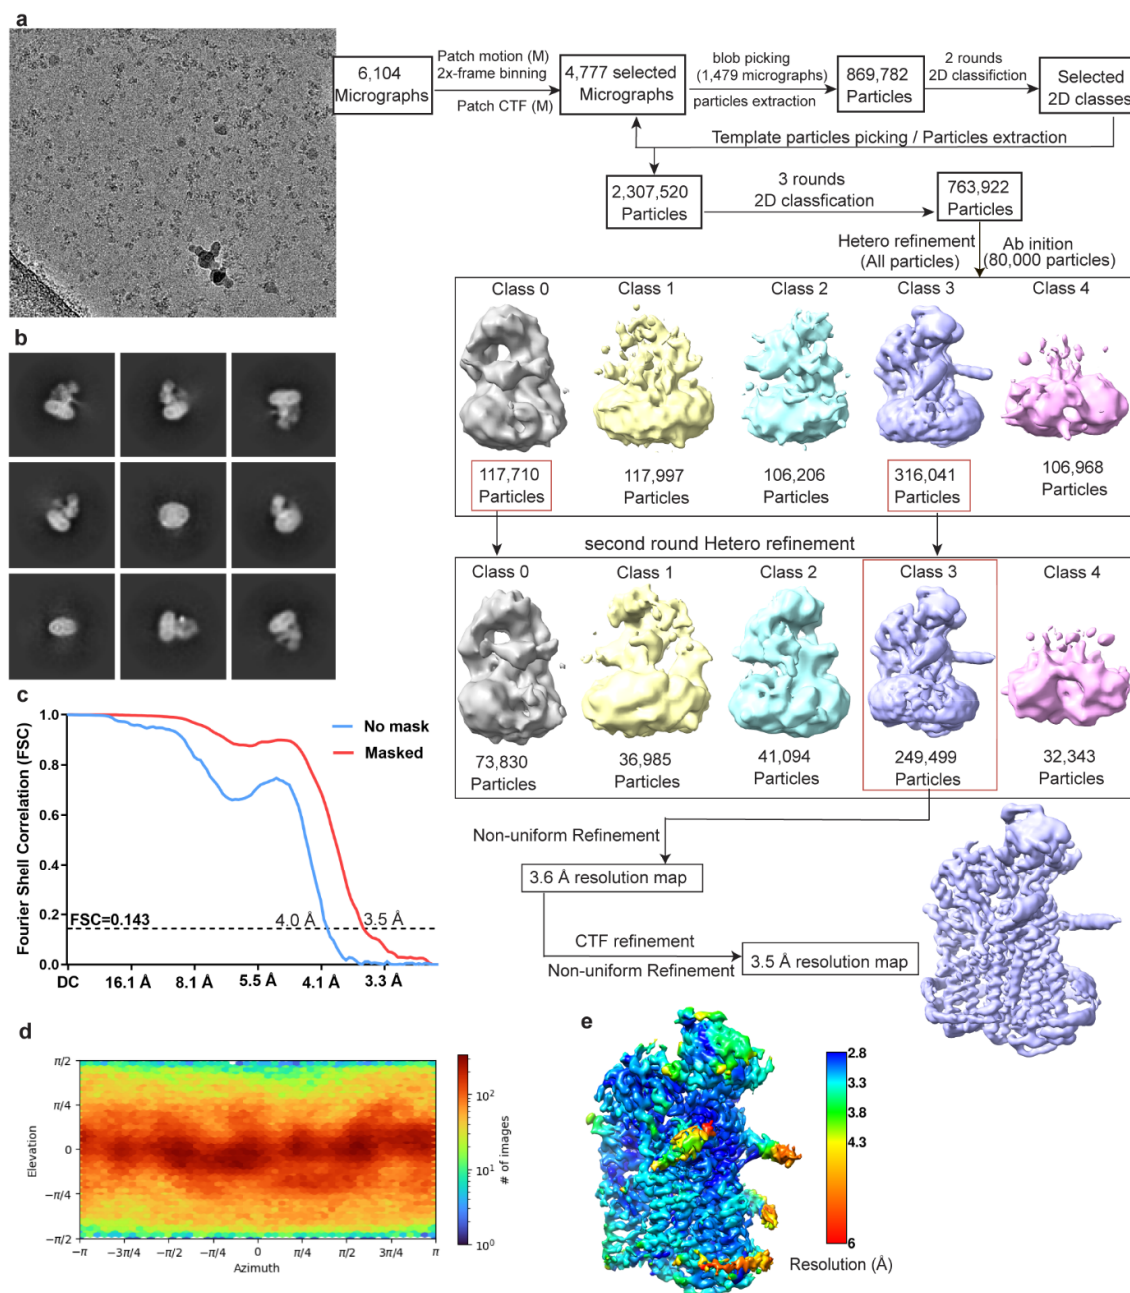

**Supplementary Fig. 3. Cryo-EM data processing for the E2P state stabilized using  $\text{BeF}_3^-$ .**  
**a** Representative motion corrected micrographs (4,777 micrographs were selected for further processing) and processing workflow. **b** Selected 2D classes with different views. **c** Gold standard Fourier shell correlation curves calculated for the reconstructed map based on a FSC 0.143 cut-off. **d** Particle orientation distributions of the final reconstruction. **e** Local resolution map based on a FSC 0.143 cut-off.

## Supplementary Fig. 4

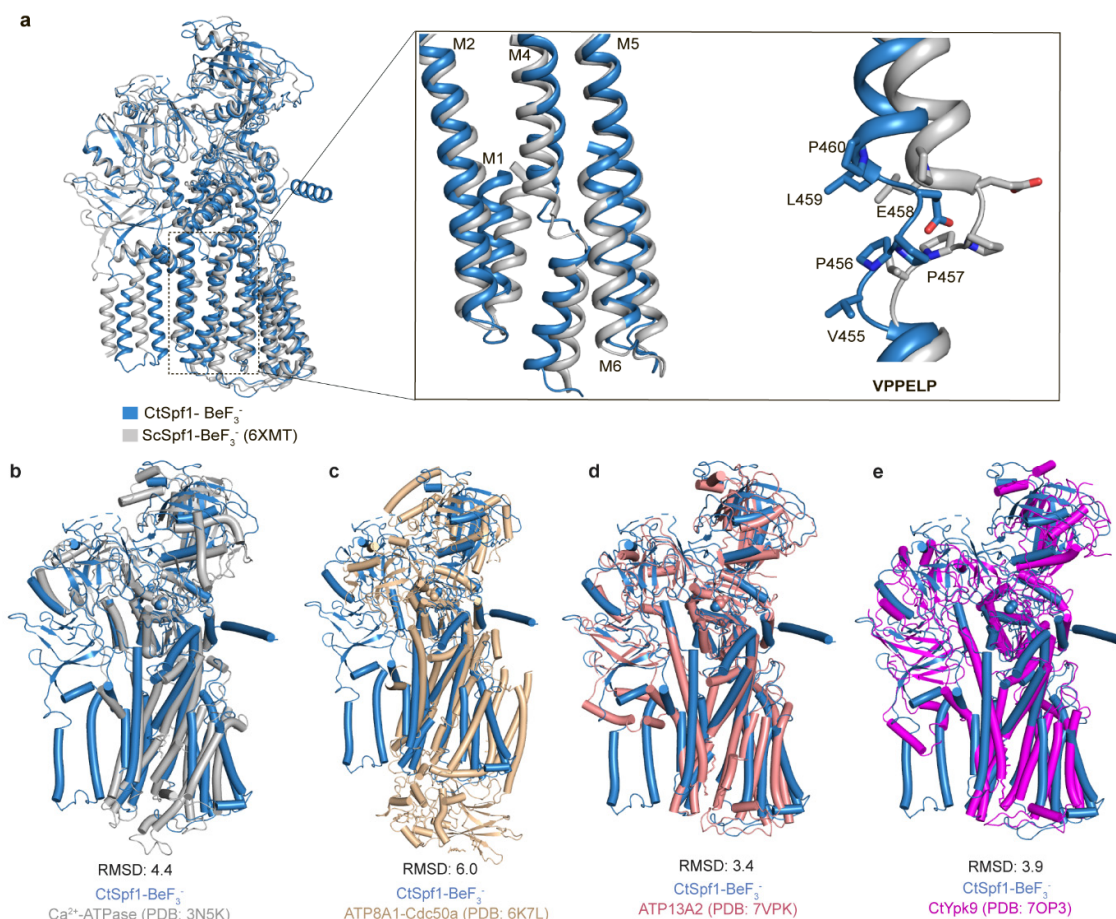

**Supplementary Fig. 4. Structural comparisons of the E2P (BeF<sub>3</sub><sup>-</sup>-stabilized) state of the P5A-ATPase CtSpf1 with the corresponding conformations of ScSpf1 (another P5A-ATPase), a P2-ATPase, a P4-ATPase, and a P5B-ATPase. a** Alignment of CtSpf1 (blue) with ScSpf1 (grey, PDB-ID 6XMT) with an overall RMSD of 2.8 Å. The different arrangement of the invariant P5A-motif PPELPM/IE of M4, which adopts a more peripheral location in ScSpf1 is shown in the close-view to the right. **b** Alignment of CtSpf1 (blue) with the Ca<sup>2+</sup>-ATPase SERCA (grey, PDB-ID 3N5K) with overall RMSD 4.4 Å. **c** Alignment of CtSpf1 (blue) with ATP8A1-Cdc50a (wheat, PDB-ID 6K7L) with overall RMSD 6.0 Å. **d** Alignment of CtSpf1 (blue) with ATP13A2 (salmon, PDB-ID 7VPK) with overall RMSD 3.4 Å. **e** Alignment of CtSpf1 (blue) with CtYpk9 (pink, PDB-ID 7OP3) with overall RMSD 3.9 Å.

Supplementary Fig. 5

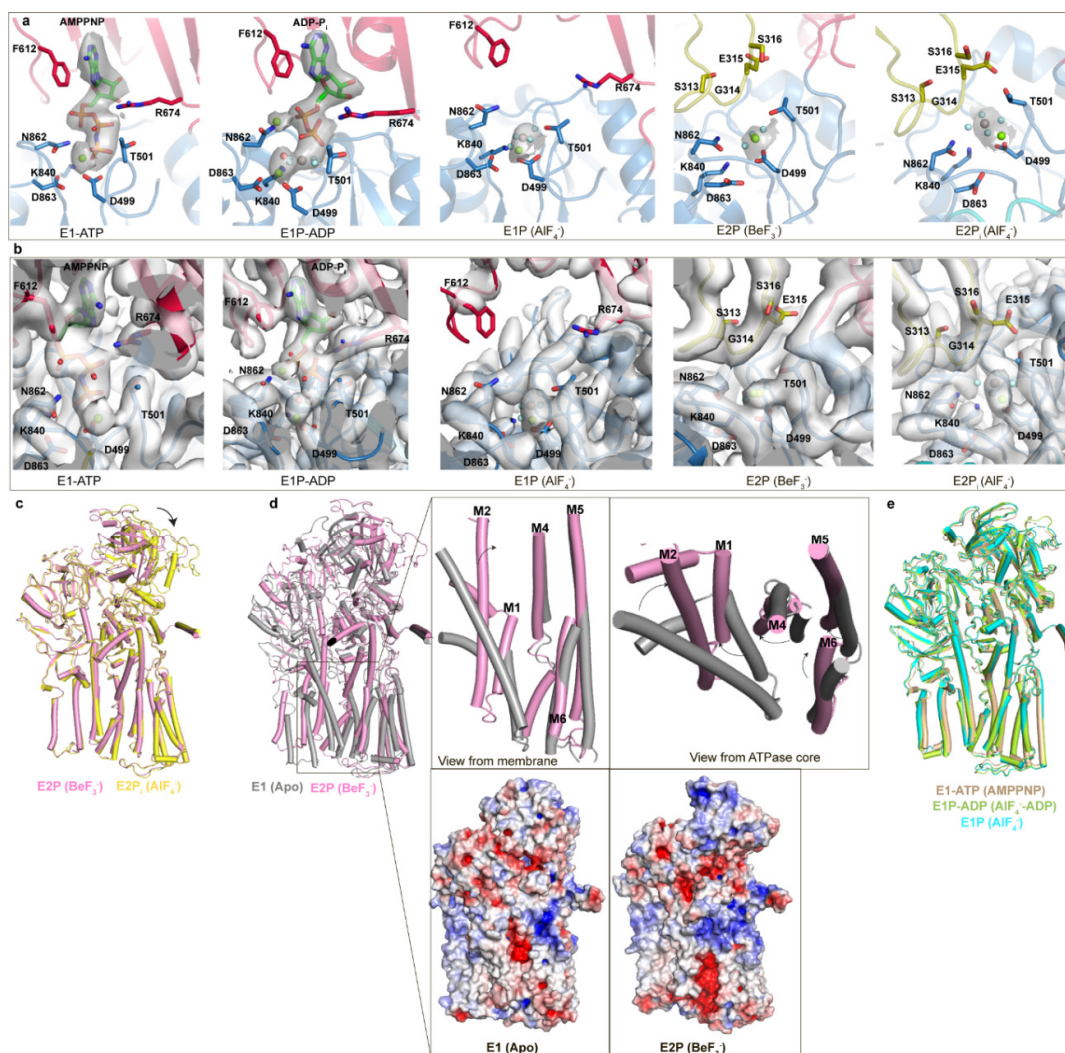

**Supplementary Fig. 5. Structural comparisons of different states of CtSpf1.** **a** The phosphorylation sites in each state. AMPPNP and ADP are shown as sticks. AlF<sub>4</sub><sup>-</sup> (grey) and BeF<sub>3</sub><sup>-</sup> (grey), Mg<sup>2+</sup> (green) and H<sub>2</sub>O (red) are depicted as spheres. Non-protein cryo-EM density is shown in grey. **b** Map and model of the phosphorylation sites in each state as in panel a but with cryo-EM density also for the surrounding region. **c** Structural comparison of the E2P and E2P<sub>i</sub> states, revealing movement of the N-domain while the membrane spanning M-domains are more similar. **d** Structural comparison of the E1 (apo) and E2P states. The close-views display the movement of the transmembrane segments, as aligned on the P-domain and M5-M10. The transport pathway, that is partially lined by M1-M6, deviates substantially between the E1 (with a cytosol-facing cavity) and E2P (the all-through the membrane cleft) state. **e** Comparison of the E1P, E1P-ADP and E1P states.



## Supplementary Fig. 6

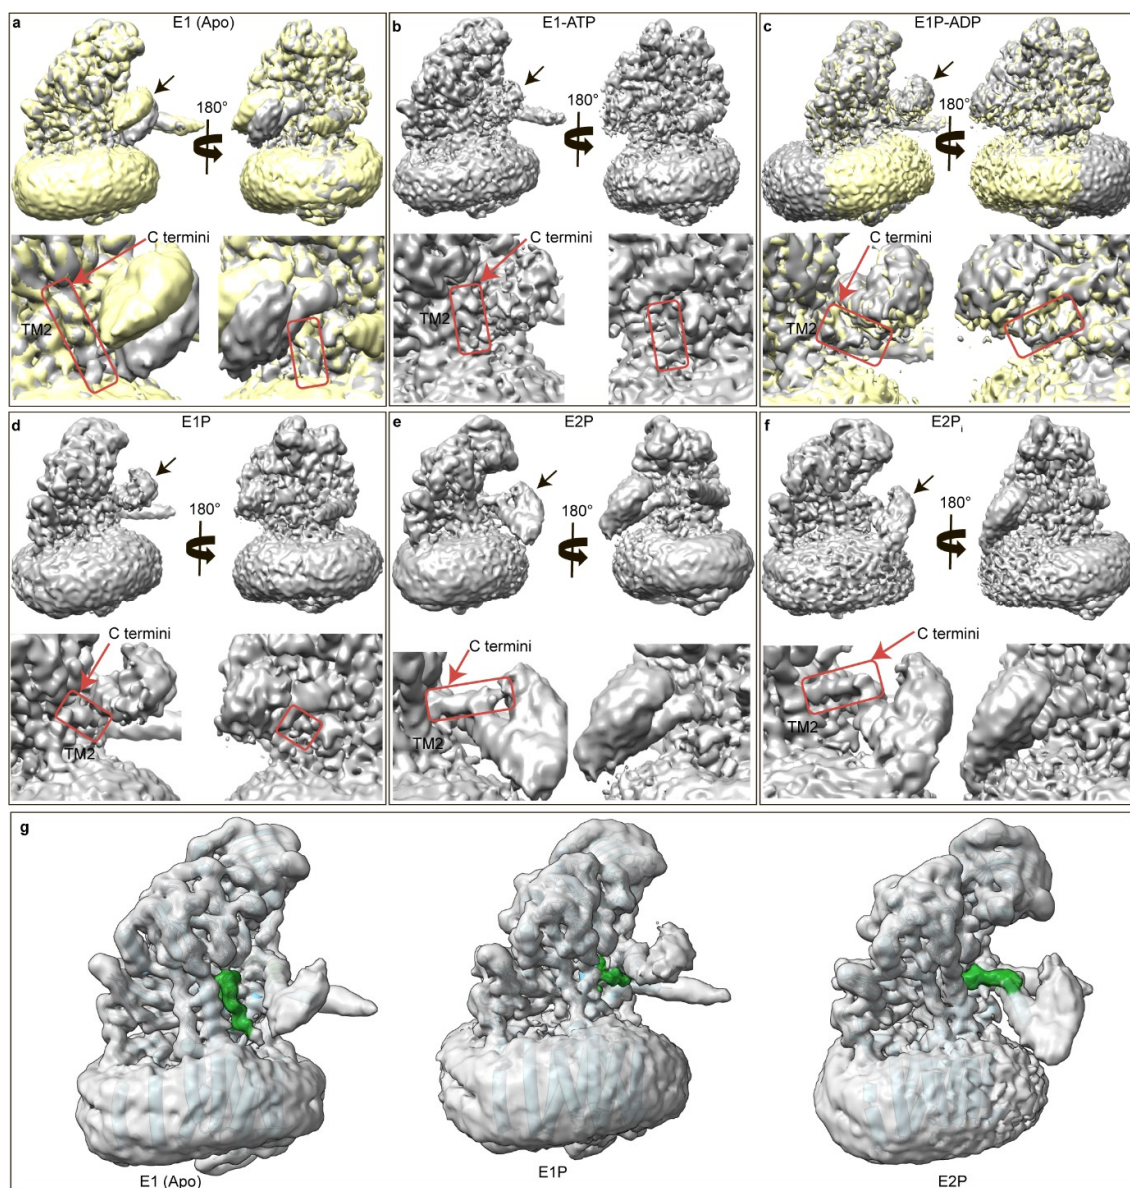

**Supplementary Fig. 6. The P-domain insertion (Plug-domain) in the different structurally determined states.** The Plug-domain is highlighted with black arrows. The C-terminal part of the Plug-domain is marked with a red box, as also pinpointed with red arrows. **a** The E1 (apo) state with two reconstructed maps, determined at 3.4 Å (grey) and 3.5 Å (yellow), see Supplementary Fig. 7. **b** The E1-ATP state. **c** Maps of the E1P-ADP state with the feature in the membrane (grey) and without membrane-feature map (yellow), see Supplementary Fig. 11. **d** The E1P state. **e** The E2P state. **f** The E2P<sub>i</sub> state. **g** Modelled CtSpf1 structures (E1, E1P and E2P in cyan) with non-sharpened cryo-EM maps (grey and green) and with the C-termini of the Plug-domain is highlighted in green.

## Supplementary Fig. 7

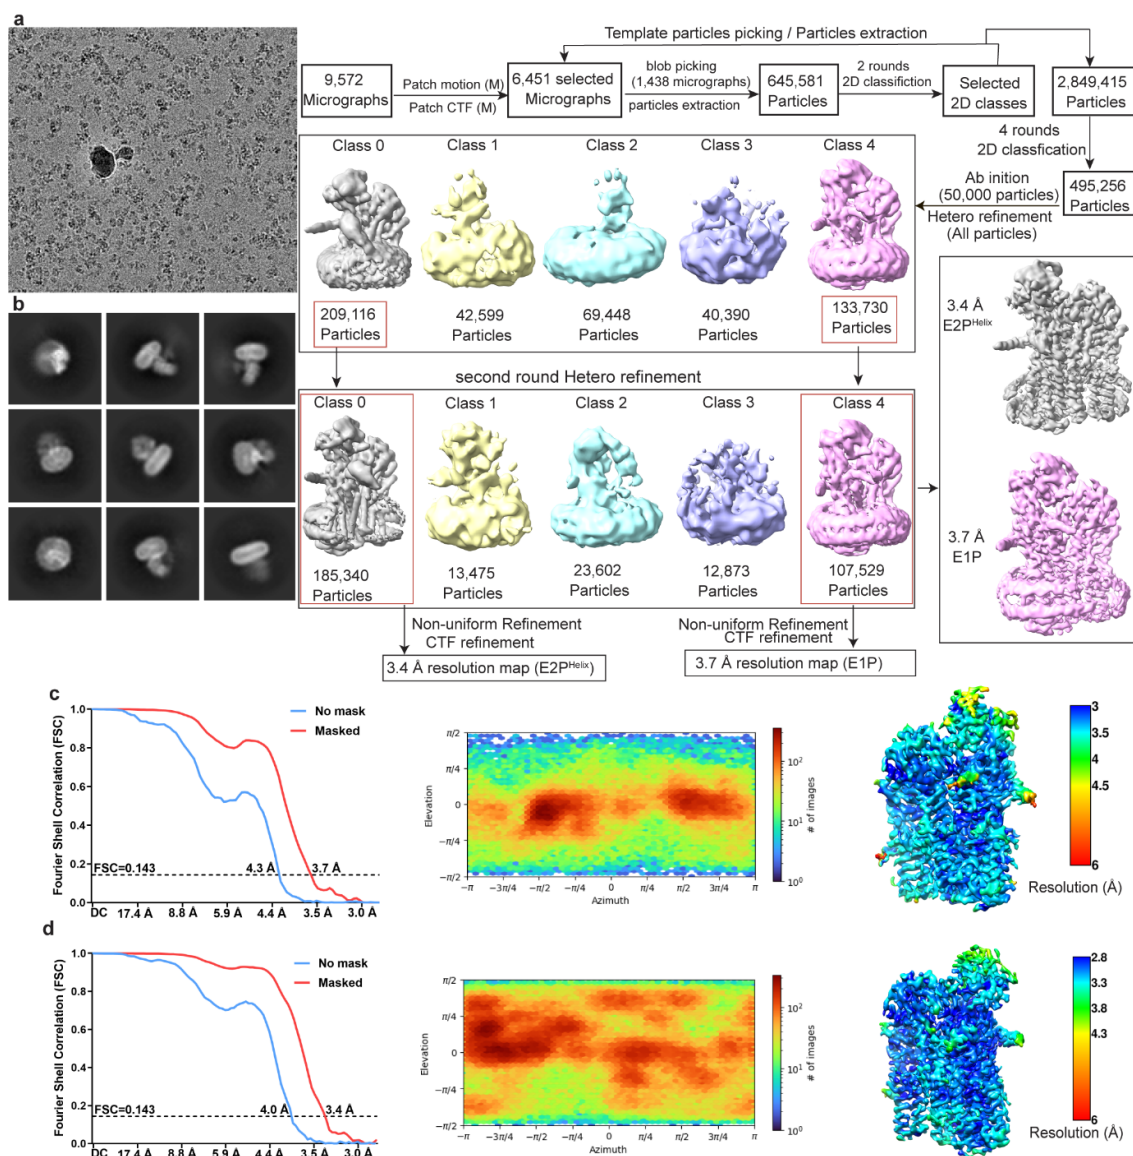

**Supplementary Fig. 7. Cryo-EM data processing for the E1P and E2.P<sub>1</sub> states stabilized using AIF<sub>4</sub><sup>-</sup>.** **a** Representative motion corrected micrographs (6,451 micrographs were selected for further processing) and processing workflow. **b** Selected 2D classes with different views. **c** E1P: Gold standard Fourier shell correlation curves calculated for the reconstructed map based on a FSC 0.143 cut-off (left), particle orientation distribution of the final reconstruction (middle), and local resolution map (FSC 0.143) of the reconstructed map (right). **d** E2.P<sub>1</sub><sup>cargo</sup>: Gold standard Fourier shell correlation curves calculated for the reconstructed map based on a FSC 0.143 cut-off (left), particle orientation distribution of the final reconstruction (middle), and local resolution map (FSC 0.143) of the reconstructed map (right).

## Supplementary Fig. 8

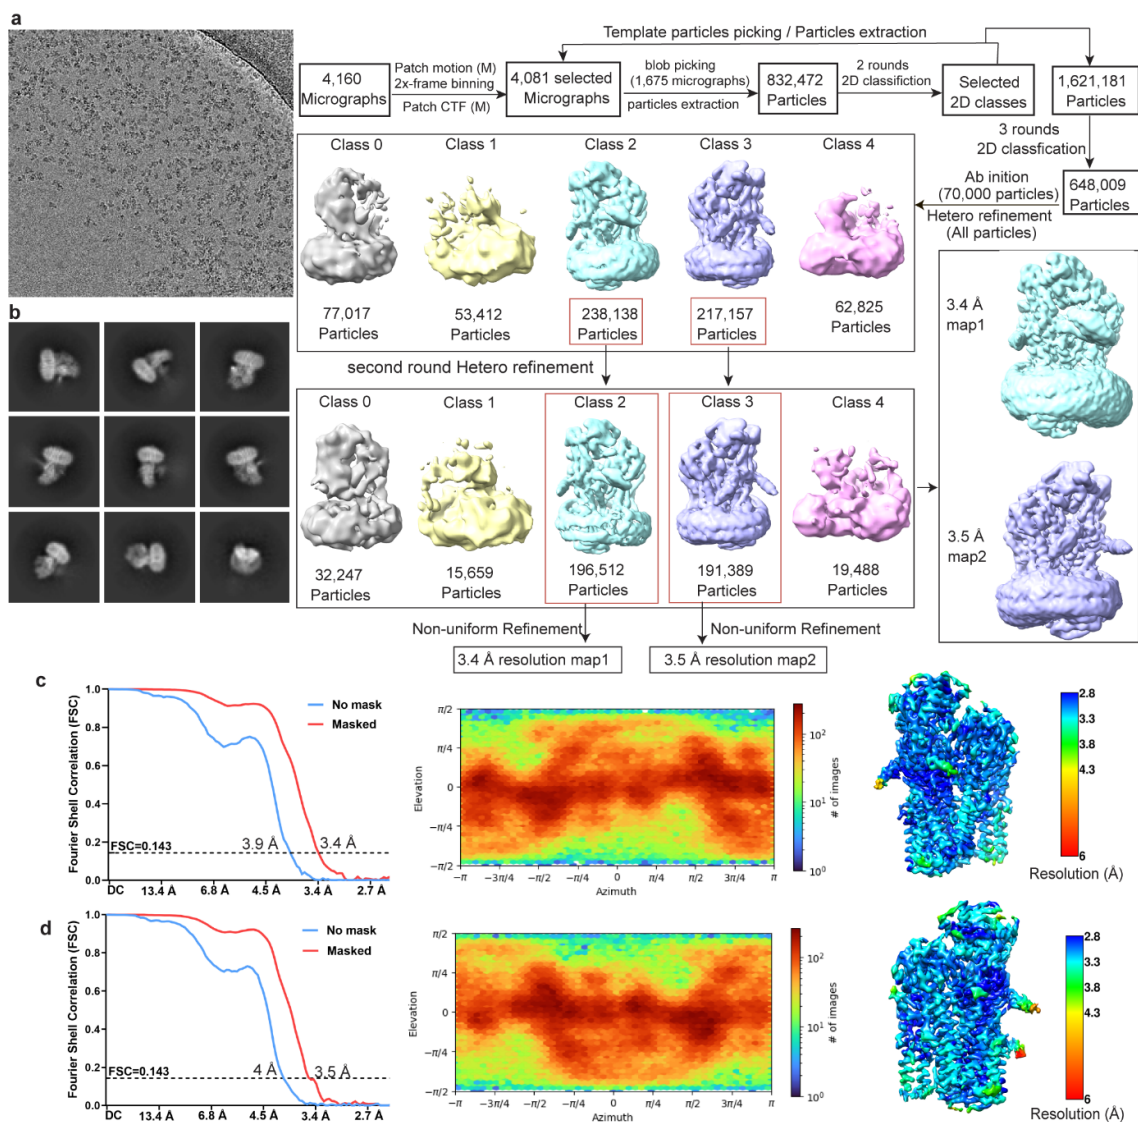

**Supplementary Fig. 8. Cryo-EM data processing for E1 (apo).** **a** Representative motion corrected micrographs (4,081) micrographs were selected for further processing) and processing workflow. **b** Selected 2D classes with different views. **c** map1: Gold standard Fourier shell correlation curves calculated for the reconstructed map based on an FSC 0.143 cut-off (left), particle orientation distribution of the final reconstruction (middle), and local resolution map (FSC 0.143) for the reconstructed map (right). **d** map2: Gold standard Fourier shell correlation curves calculated for the reconstructed map based on an FSC 0.143 cut-off (left), particle orientation distribution of the final reconstruction (middle), and local resolution map (FSC 0.143) for the reconstructed map (right).

### Supplementary Fig. 9

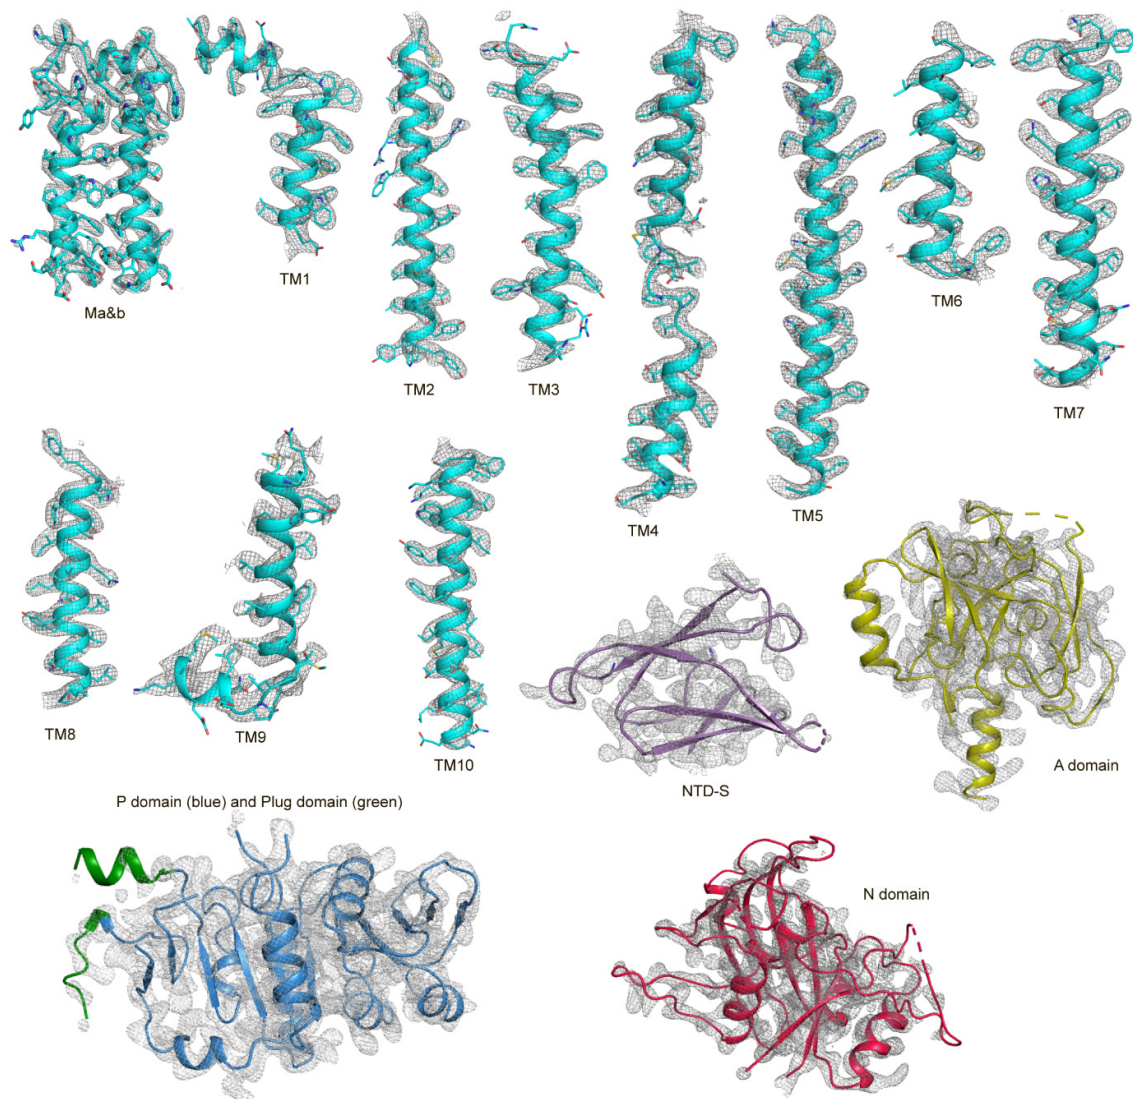

**Supplementary Fig. 9. Cryo-EM density and associated model of representative parts of the E1 (apo) state.** The transmembrane helices are shown in cartoon with stick sidechains. Soluble domains are shown in cartoon and the densities are show as grey mesh.

## Supplementary Fig. 10

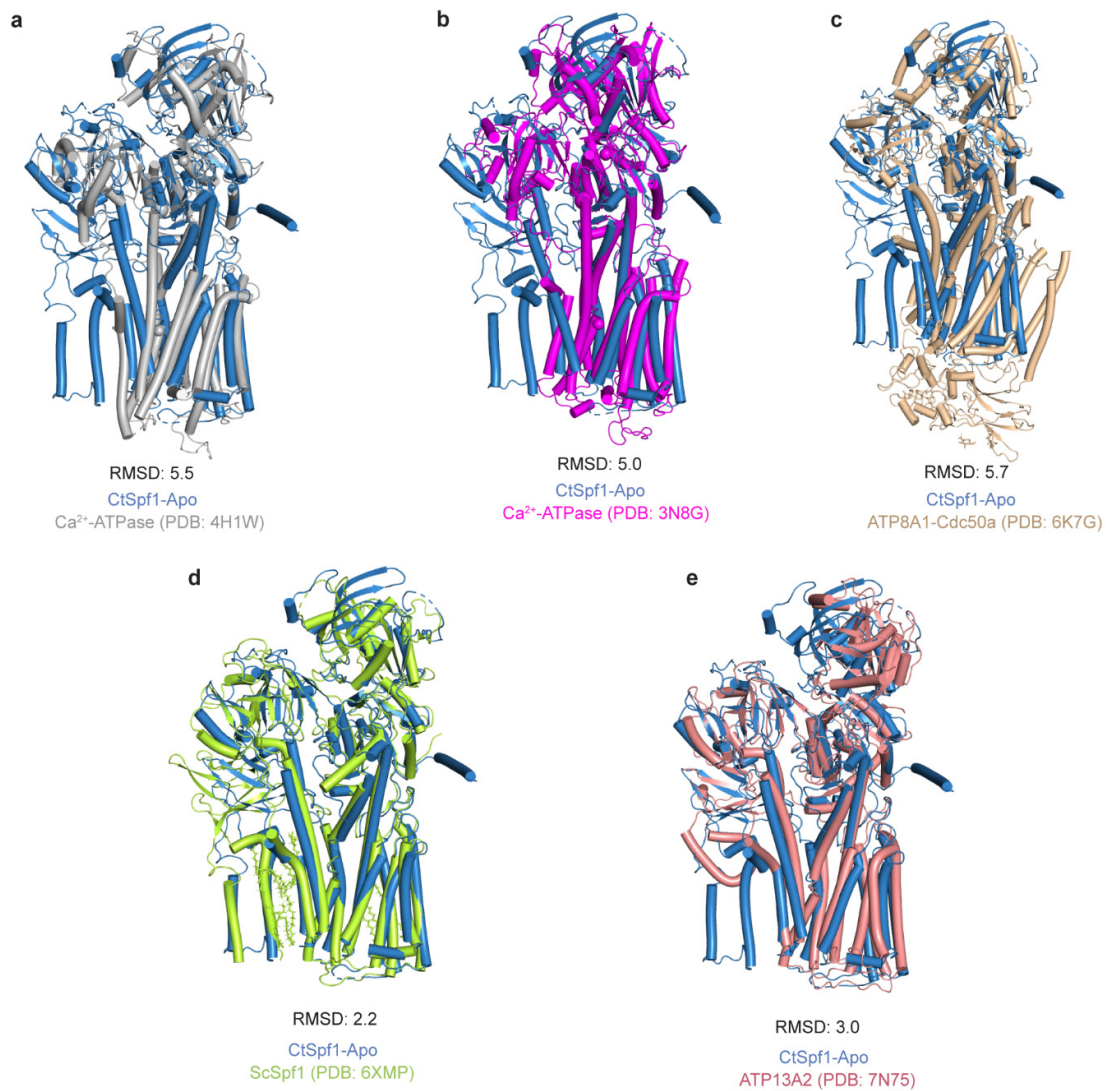

**Supplementary Fig. 10. Structural comparisons of the E1 (apo) state of the P5A-ATPase CtSpf1 with relevant conformations of a P2-ATPase, a P4-ATPase, another P5A-ATPase (ScSpf1) and a P5B-ATPase. a** Alignment of CtSpf1 (blue) with the Ca<sup>2+</sup>-ATPase SERCA (grey, PDB-ID 4H1W). **b** Alignment of CtSpf1 (blue) with Ca<sup>2+</sup>-ATPase (magenta, PDB-ID 3N8G). **c** Alignment of CtSpf1 (blue) with ATP8A1-Cdc50a (wheat, PDB-ID 6K7G). **d** Alignment of CtSpf1 (blue) with ScSpf1-Apo (limon, PDB-ID 6XMP). **e** Alignment of CtSpf1 (blue) with ATP13A2 (salmon, PDB-ID 7N75).

## Supplementary Fig. 11

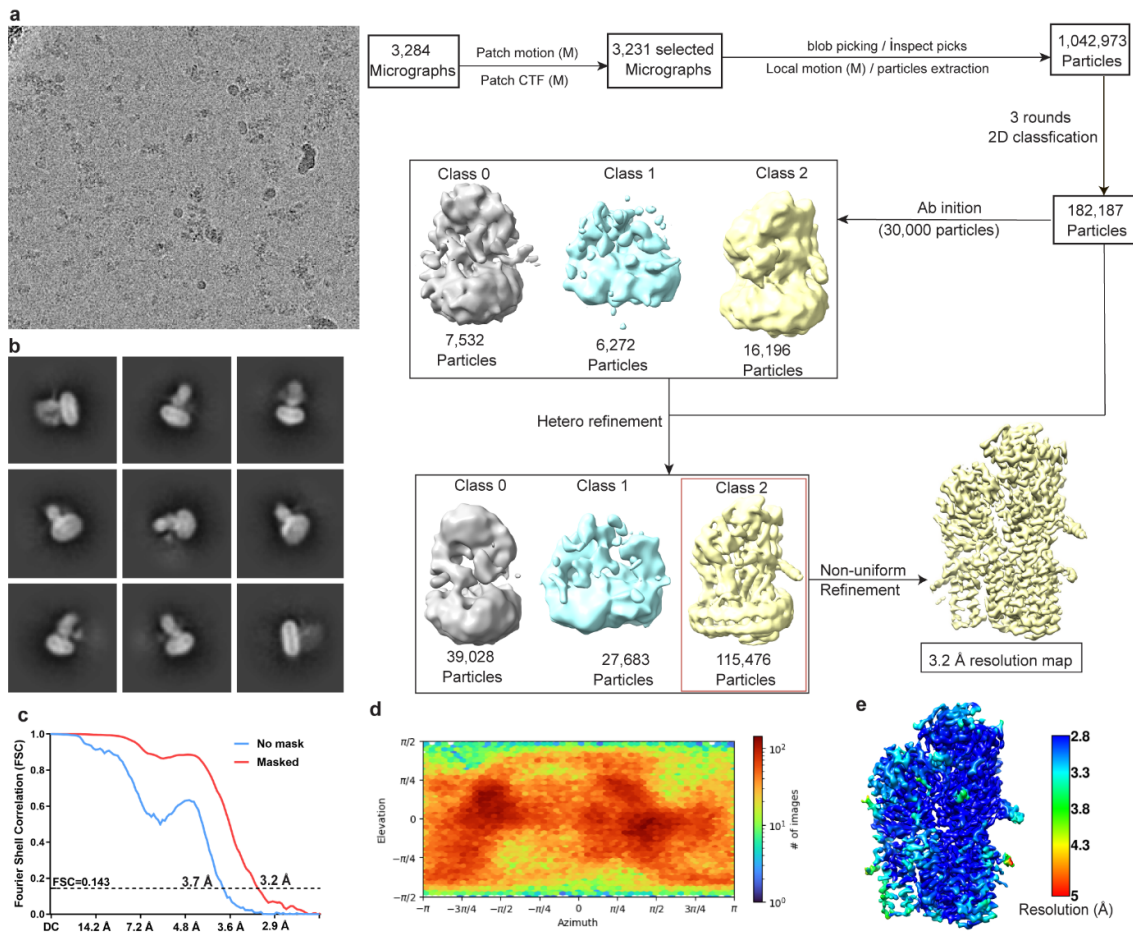

**Supplementary Fig. 11. Cryo-EM data processing for the E1-ATP state stabilized by AMP-PNP.** **a** Representative motion corrected micrographs (3,231 micrographs were selected for further processing) and processing workflow. **b** Selected 2D classes with different views. **c** Gold standard Fourier shell correlation curve calculated for the reconstructed map based on a FSC 0.143 cut-off. **d** Particle orientation distribution of the final reconstruction. **e** Local resolution map based on a FSC 0.143 cut-off.

## Supplementary Fig. 12

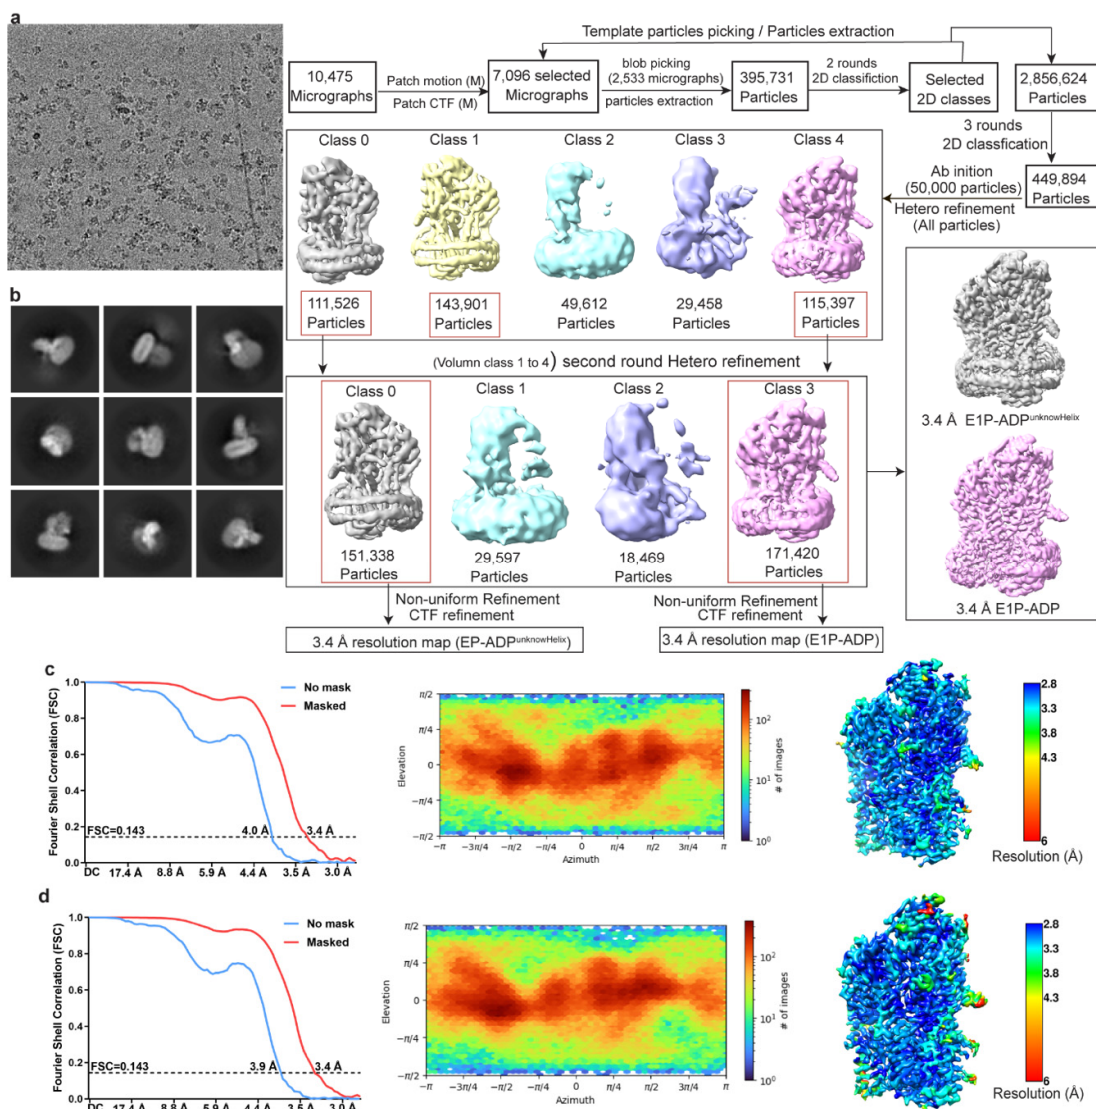

**Supplementary Fig. 12. Cryo-EM data processing for the E1P-ADP and E1P-ADP<sup>membranous-feature</sup> states stabilized by AlF<sub>4</sub><sup>-</sup> and ADP.** **a** Representative motion corrected micrographs (7,096 micrographs were selected for further processing) and processing workflow. **b** Selected 2D classes with different views. **c** E1P-ADP<sup>membranous-feature</sup>: Gold standard Fourier shell correlation curve calculated for the reconstructed map based on an FSC 0.143 cut-off (left), particle orientation distributions of the final reconstruction (middle) and local resolution map for the reconstructed map (FSC 0.143) with additional unassigned cryo-EM density (right). **d** E1P-ADP: Gold standard Fourier shell correlation curve calculated for the reconstructed map based on an FSC 0.143 cut-off (left), particle orientation distributions of the final reconstruction (middle) and local resolution map for the reconstructed map (FSC 0.143) without additional unassigned cryo-EM density (right).

**Supplementary Fig. 13**

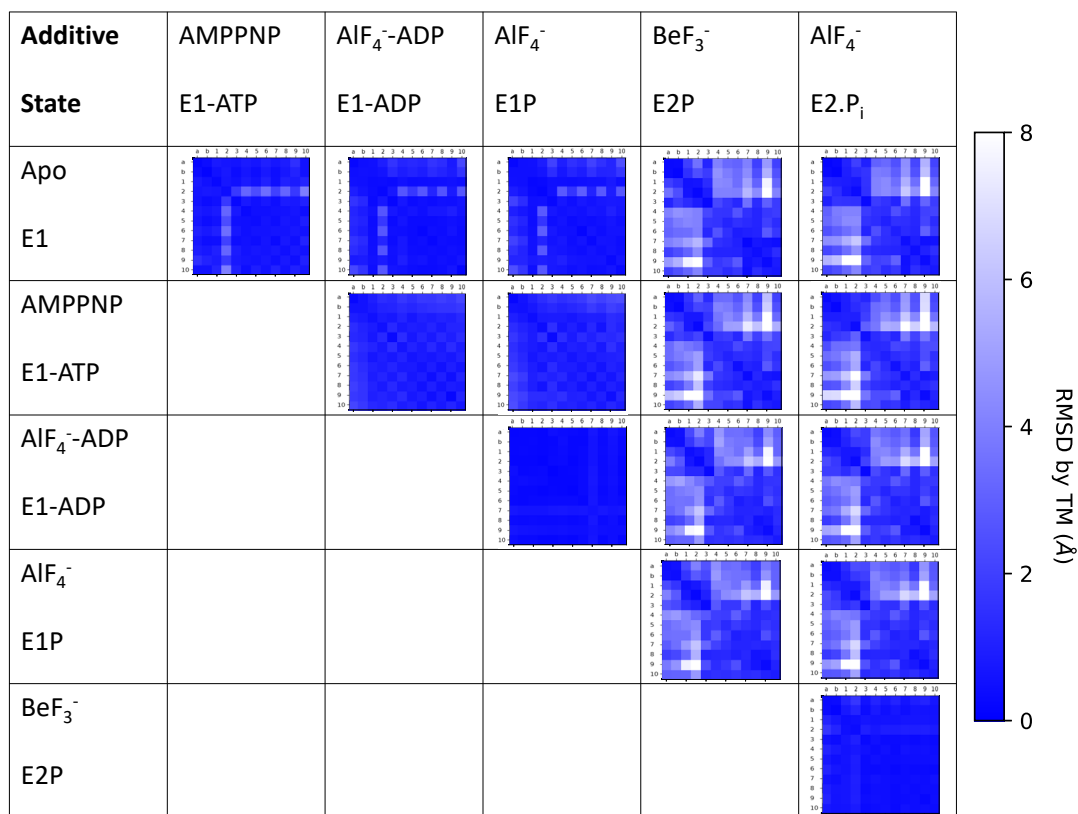

**Supplementary Fig. 13. Distance difference matrices comparing the positions of TM helices across the different determined CtSpf1 structures.** The analysis was conducted as previously reported, using overall alignments<sup>1-3</sup>. Each individual matrix shows relative differences in position of helices Ma, Mb, M1, M2, M3, etcetera from left to right and top to bottom. When comparing E1 states with E2P states the helices move as two blocks: Ma-M2 and M4-M10, with M3 remaining relatively stationary.



### Supplementary Fig. 14

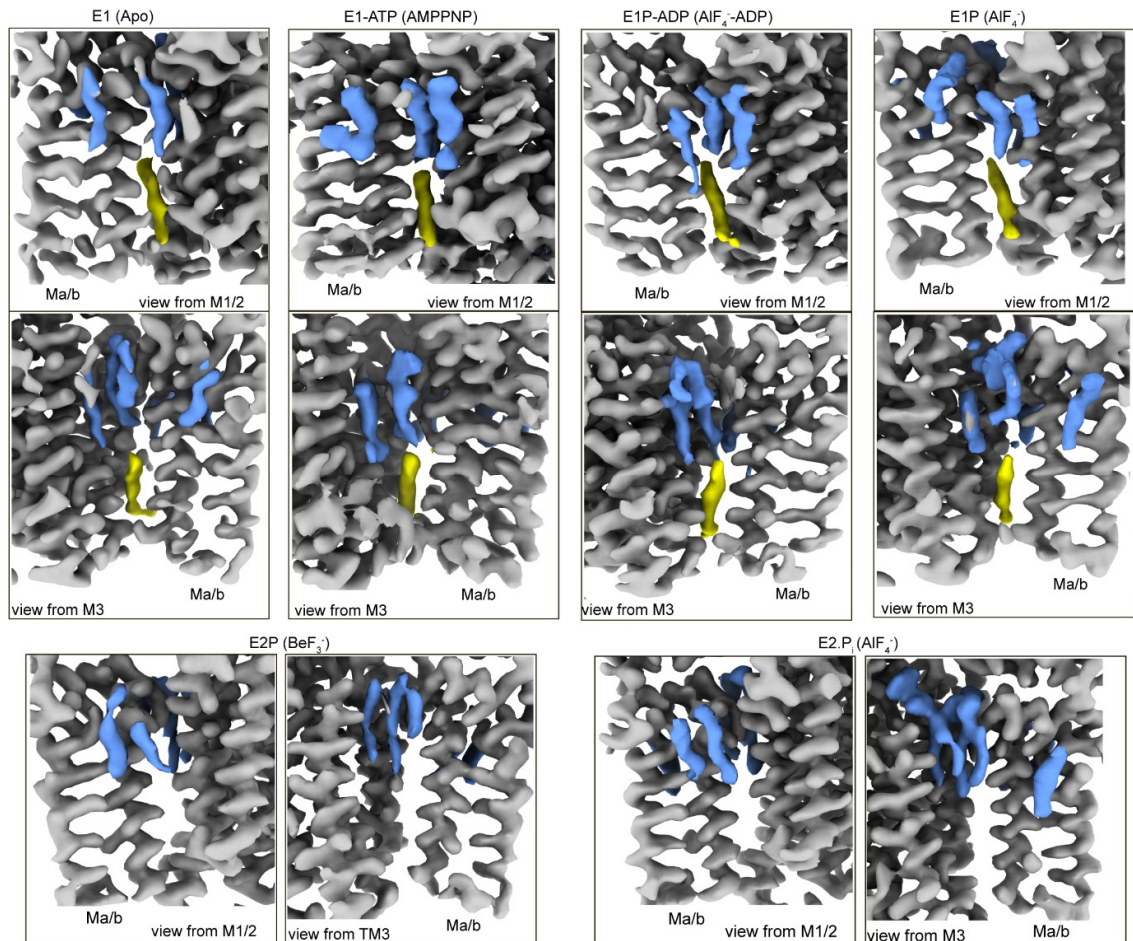

**Supplementary Fig. 14. Identified cryo-EM densities that may represent lipids.** Close-views of complementary non ATPase cryo-EM features. The blue densities close to the cytosol are present in all states. The yellow features are present in all E1, but not in the E2 states recovered here.

Supplementary Fig. 15

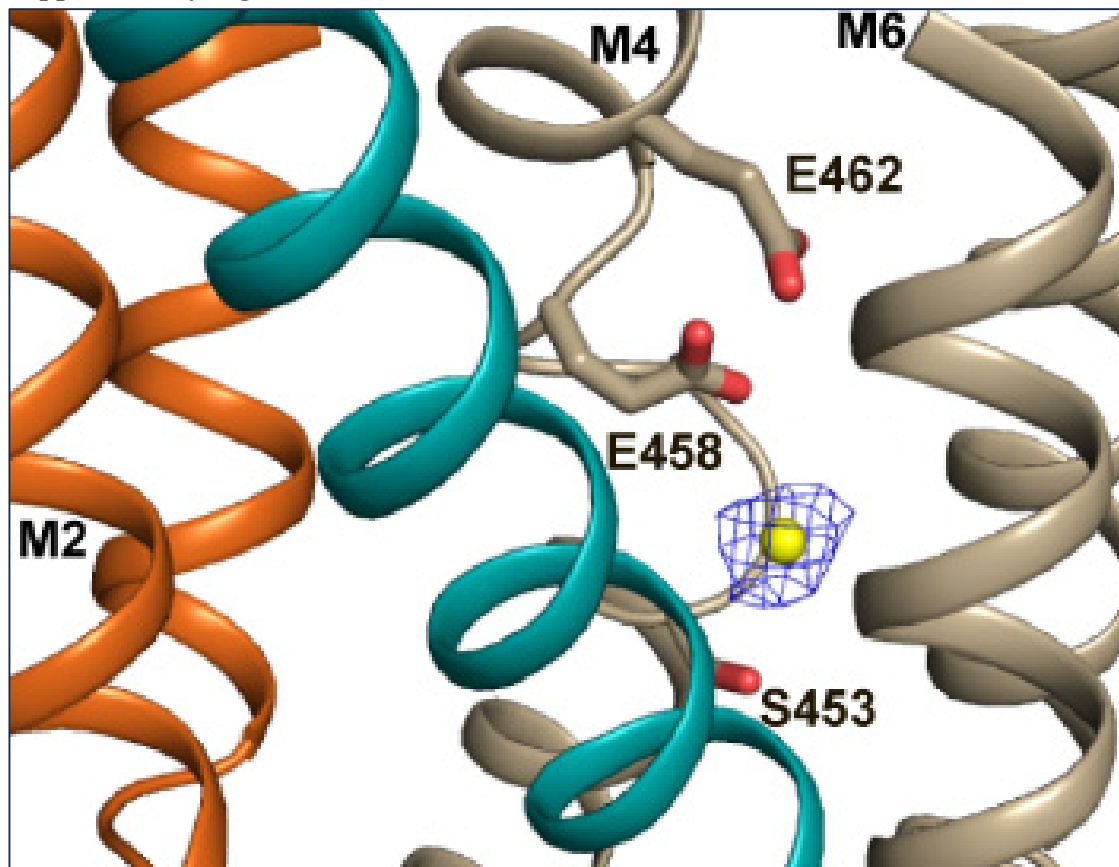

Supplementary Fig. 15. Unexplained cryo-EM density (blue) in E2.P<sub>i</sub> structure.

**Supplementary Table 1**

| Spfl                                                            | PDB ID      | 6XMP        | 6XMQ           | 6XMS                                  | 6XMT                                  | 6XMU                                                                |                                        |
|-----------------------------------------------------------------|-------------|-------------|----------------|---------------------------------------|---------------------------------------|---------------------------------------------------------------------|----------------------------------------|
|                                                                 |             | Spfl Apo    | Spfl (AMP-PCP) | Spfl (AlF <sub>4</sub> <sup>-</sup> ) | Spfl (BeF <sub>3</sub> <sup>-</sup> ) | Spfl (BeF <sub>3</sub> <sup>-</sup> )<br>Endogenous substrate bound |                                        |
| Apo                                                             | <b>6XMP</b> | 0.0         | 0.7            | 0.5                                   | 6.6                                   | 6.7                                                                 |                                        |
| AMP-PCP bound                                                   | <b>6XMQ</b> | 0.7         | 0.0            | 0.6                                   | 6.7                                   | 6.8                                                                 |                                        |
| AlF <sub>4</sub> <sup>-</sup> bound                             | <b>6XMS</b> | 0.5         | 0.6            | 0.0                                   | 6.5                                   | 6.6                                                                 |                                        |
| BeF <sub>3</sub> <sup>-</sup> bound                             | <b>6XMT</b> | 6.6         | 6.7            | 6.5                                   | 0.0                                   | 0.4                                                                 |                                        |
| BeF <sub>3</sub> <sup>-</sup> and<br>Endogenous substrate bound | <b>6XMU</b> | 6.7         | 6.8            | 6.6                                   | 0.4                                   | 0.0                                                                 |                                        |
| <b>CtSpfl</b>                                                   |             |             |                |                                       |                                       |                                                                     |                                        |
| Apo                                                             | <b>8OP3</b> | 1.8         | 1.9            | 1.8                                   | 7.0                                   | 7.1                                                                 |                                        |
| E1-ATP                                                          | <b>8OP4</b> | 2.1         | 2.0            | 1.7                                   | 6.8                                   | 6.9                                                                 |                                        |
| E1P:ADP                                                         | <b>8OP5</b> | 1.6         | 1.4            | 1.2                                   | 6.6                                   | 6.7                                                                 |                                        |
| E1P (AlF <sub>4</sub> <sup>-</sup> )                            | <b>8OP6</b> | 1.7         | 1.4            | 1.4                                   | 6.4                                   | 6.5                                                                 |                                        |
| E2-P (BeF <sub>3</sub> <sup>-</sup> )                           | <b>8OP7</b> | 6.5         | 6.7            | 6.6                                   | 2.8                                   | 2.7                                                                 |                                        |
| E2:Pi (AlF <sub>4</sub> <sup>-</sup> )                          | <b>8OP8</b> | 6.2         | 6.4            | 6.3                                   | 4.2                                   | 4.2                                                                 |                                        |
| <b>CtSpfl</b>                                                   |             |             |                |                                       |                                       |                                                                     |                                        |
| <b>CtSpfl</b>                                                   | PDB ID      | <b>8OP3</b> | <b>8OP4</b>    | <b>8OP5</b>                           | <b>8OP6</b>                           | <b>8OP7</b>                                                         | <b>8OP8</b>                            |
|                                                                 |             | Apo         | E1-ATP         | E1P:ADP                               | E1P (AlF <sub>4</sub> <sup>-</sup> )  | E2-P (BeF <sub>3</sub> <sup>-</sup> )                               | E2:Pi (AlF <sub>4</sub> <sup>-</sup> ) |
| Apo                                                             | <b>8OP3</b> | 0.0         | 2.5            | 2.0                                   | 1.6                                   | 6.5                                                                 | 6.5                                    |
| E1-ATP                                                          | <b>8OP4</b> | 2.5         | 0.0            | 1.3                                   | 1.6                                   | 6.5                                                                 | 6.6                                    |
| E1P:ADP                                                         | <b>8OP5</b> | 2.0         | 1.3            | 0.0                                   | 0.6                                   | 6.7                                                                 | 6.7                                    |
| E1P (AlF <sub>4</sub> <sup>-</sup> )                            | <b>8OP6</b> | 1.6         | 1.6            | 0.6                                   | 0.0                                   | 6.6                                                                 | 6.7                                    |
| E2-P (BeF <sub>3</sub> <sup>-</sup> )                           | <b>8OP7</b> | 6.5         | 6.5            | 6.7                                   | 6.6                                   | 0.0                                                                 | 0.7                                    |
| E2:Pi (AlF <sub>4</sub> <sup>-</sup> )                          | <b>8OP8</b> | 6.5         | 6.6            | 6.7                                   | 6.7                                   | 0.7                                                                 | 0.0                                    |

**Supplementary Table 1. Overall structural alignments of previously available (of CsSpfl) and here determined (CtSpfl) structures of P5A-ATPases. RMSD (Å) values are indicated. Homologous structures (RMSD < 1 Å) are highlighted in grey and blue, respectively. The most similar structures between CsSpfl and CtSpfl are indicated in green.**

## Supplementary Table 2

|                                                  | E1 (Apo)<br>(EMDB-17039)<br>(PDB-8OP3) | E1-ATP<br>(AMPPNP)<br>(EMDB-17040)<br>(PDB-8OP4) | E1P-<br>ADP <sup>membranous-</sup><br>feature<br>(ADP-ALF <sub>4</sub> )<br>(EMDB-17041)<br>(PDB-8OP5) | E1P <sup>cytosolic-feature</sup><br>(ALF <sub>4</sub> )<br>(EMDB-17042)<br>(PDB-8OP6) | E2P <sup>cargo</sup><br>(BeF <sub>3</sub> )<br>(EMDB-17043)<br>(PDB-8OP7) | E2.P <sub>i</sub> <sup>cargo</sup><br>(ALF <sub>4</sub> )<br>(EMDB-17044)<br>(PDB-8OP8) |
|--------------------------------------------------|----------------------------------------|--------------------------------------------------|--------------------------------------------------------------------------------------------------------|---------------------------------------------------------------------------------------|---------------------------------------------------------------------------|-----------------------------------------------------------------------------------------|
| <b>Data collection and processing</b>            |                                        |                                                  |                                                                                                        |                                                                                       |                                                                           |                                                                                         |
| Magnification                                    | 105,000                                | 105,000                                          | 105,000                                                                                                | 105,000                                                                               | 105,000                                                                   | 105,000                                                                                 |
| Voltage (kV)                                     | 300                                    | 300                                              | 300                                                                                                    | 300                                                                                   | 300                                                                       | 300                                                                                     |
| Total exposure (e <sup>-</sup> /Å <sup>2</sup> ) | 50                                     | 40                                               | 50                                                                                                     | 50.2                                                                                  | 50                                                                        | 50.2                                                                                    |
| Defocus range (µm)                               | -1.0 to -2.5                           | -1.2 to -2.6                                     | -0.7 to -2.7                                                                                           | -0.5 to -2.75                                                                         | -1.0 to -2.5                                                              | -0.5 to -2.75                                                                           |
| Pixel size (Å)                                   | 1.1                                    | 0.832                                            | 0.846                                                                                                  | 0.8464                                                                                | 1.1                                                                       | 0.8464                                                                                  |
| Symmetry imposed                                 | C1                                     | C1                                               | C1                                                                                                     | C1                                                                                    | C1                                                                        | C1                                                                                      |
| Initial particle (no.)                           | 648,009                                | 182,187                                          | 449,894                                                                                                | 495,256                                                                               | 763,922                                                                   | 495,256                                                                                 |
| Final particle (no.)                             | 196,512                                | 115,476                                          | 151,338                                                                                                | 107,529                                                                               | 249,499                                                                   | 185,340                                                                                 |
| Map resolution (Å)                               | 3.5                                    | 3.2                                              | 3.4                                                                                                    | 3.7                                                                                   | 3.5                                                                       | 3.4                                                                                     |
| FSC threshold                                    | 0.143                                  | 0.143                                            | 0.143                                                                                                  | 0.143                                                                                 | 0.143                                                                     | 0.143                                                                                   |
| <b>Refinement</b>                                |                                        |                                                  |                                                                                                        |                                                                                       |                                                                           |                                                                                         |
| Model resolution (Å)                             | 3.6                                    | 3.3                                              | 3.6                                                                                                    | 3.9                                                                                   | 3.7                                                                       | 3.6                                                                                     |
| FSC threshold                                    | 0.5                                    | 0.5                                              | 0.5                                                                                                    | 0.5                                                                                   | 0.5                                                                       | 0.5                                                                                     |
| Map sharpening <i>B</i> factor (Å <sup>2</sup> ) | -175.3                                 | -80                                              | -175.3                                                                                                 | -130                                                                                  | -120                                                                      | -130                                                                                    |
| <b>Model composition</b>                         |                                        |                                                  |                                                                                                        |                                                                                       |                                                                           |                                                                                         |
| Non-hydrogen atoms                               | 8,888                                  | 8,879                                            | 9,007                                                                                                  | 8,971                                                                                 | 9,166                                                                     | 9,269                                                                                   |
| Protein residues                                 | 1,127                                  | 1,123                                            | 1,140                                                                                                  | 1,138                                                                                 | 1,162                                                                     | 1,186                                                                                   |
| Ligands                                          |                                        | MG: 1; ANP: 1                                    | MG: 2; ALF: 1;<br>ADP: 1                                                                               | MG: 1; ALF: 1                                                                         | MG: 1; BEF: 1                                                             | MG: 1; ALF: 1;<br>CA: 1                                                                 |
| <b><i>B</i> factors (Å<sup>2</sup>)</b>          |                                        |                                                  |                                                                                                        |                                                                                       |                                                                           |                                                                                         |
| Protein                                          | 62.35                                  | 85.23                                            | 92.76                                                                                                  | 89.54                                                                                 | 113.16                                                                    | 131.06                                                                                  |
| Ligand                                           |                                        | 71.04                                            | 76.44                                                                                                  | 66.24                                                                                 | 85.13                                                                     | 103.81                                                                                  |
| <b>R.m.s. deviations</b>                         |                                        |                                                  |                                                                                                        |                                                                                       |                                                                           |                                                                                         |
| Bond lengths (Å)                                 | 0.002                                  | 0.003                                            | 0.003                                                                                                  | 0.002                                                                                 | 0.003                                                                     | 0.003                                                                                   |
| Bond angles (°)                                  | 0.527                                  | 0.726                                            | 0.578                                                                                                  | 0.572                                                                                 | 0.605                                                                     | 0.532                                                                                   |
| <b>Validation</b>                                |                                        |                                                  |                                                                                                        |                                                                                       |                                                                           |                                                                                         |
| MolProbity score                                 | 1.2                                    | 1.36                                             | 1.05                                                                                                   | 1.44                                                                                  | 1.44                                                                      | 1.38                                                                                    |
| Clashscore                                       | 2.78                                   | 5.02                                             | 2.59                                                                                                   | 4.86                                                                                  | 4.27                                                                      | 3.53                                                                                    |
| Poor rotamers (%)                                | 0                                      | 0.21                                             | 0.1                                                                                                    | 0                                                                                     | 0.20                                                                      | 0                                                                                       |
| <b>Ramachandran plot</b>                         |                                        |                                                  |                                                                                                        |                                                                                       |                                                                           |                                                                                         |
| Favored (%)                                      | 97.3                                   | 97.57                                            | 97.96                                                                                                  | 96.89                                                                                 | 96.45                                                                     | 96.43                                                                                   |
| Allowed (%)                                      | 2.70                                   | 2.43                                             | 2.04                                                                                                   | 3.11                                                                                  | 3.55                                                                      | 3.57                                                                                    |
| Disallowed (%)                                   | 0.00                                   | 0.00                                             | 0.00                                                                                                   | 0.00                                                                                  | 0.00                                                                      | 0.00                                                                                    |

**Supplementary Table 2. Cryo-EM data collection, refinement and validation statistics**

## 1 Supplementary Table 3

|               | UniProt     | Present in     | Protein name                                         | Nr of peptide hits | Unique peptides | Cellular location                 | Helix type/number of helices      | Location of N-terminus            | Location of C-terminus            | Location of majority of protein   |
|---------------|-------------|----------------|------------------------------------------------------|--------------------|-----------------|-----------------------------------|-----------------------------------|-----------------------------------|-----------------------------------|-----------------------------------|
| 1 TM proteins | P16547      | More in SpfBef | Mitochondrial outer membrane protein OM45            | 40                 | 40              | Mitochondrial outer membrane      | N-terminal helix                  | Mitochondrial intermembrane space | Cytoplasm                         | Cytoplasm                         |
|               | P27614      | More in SpfBef | Carboxypeptidase S                                   | 28                 | 28              | Vacuole                           | N-terminal helix                  | Cytoplasm                         | Lumen                             | Lumen                             |
|               | Q08179      | SpfBef only    | Mitochondrial distribution and morphology protein 38 | 15                 | 15              | Mitochondrial inner membrane      | Helix at residues 139-159         | Mitochondrial intermembrane space | Mitochondrial matrix              | Mitochondrial matrix              |
|               | P40557      | SpfBef only    | ER-retained PMA1-suppressing protein 1               | 13                 | 13              | ER                                | C-terminal helix                  | Lumen                             | Cytoplasm                         | Lumen                             |
|               | P10614      | SpfBef only    | Lanosterol 14-alpha demethylase CYP51                | 7                  | 7               | ER                                | N-terminal helix                  | ER lumen                          | Cytoplasm                         | Cytoplasm                         |
|               | P39006      | SpfBef only    | Phosphatidylserine decarboxylase proenzyme 1         | 7                  | 7               | ER & Mitochondrial inner membrane | Helix at residues 80-98           | Mitochondrial matrix              | Mitochondrial intermembrane space | Mitochondrial intermembrane space |
|               | P46982      | SpfBef only    | Alpha-1,2-mannosyltransferase MNN5                   | 7                  | 7               | Golgi                             | N-terminal signal peptide helix   | Cytoplasm?                        | Lumen?                            | Lumen?                            |
|               | P29704      | SpfBef only    | Squalene synthase                                    | 5                  | 5               | ER & Microsome                    | C-terminal TA-helix               | Cytoplasm                         | Lumen                             | Cytoplasm                         |
|               | P38069      | SpfBef only    | Alpha-1,2-mannosyltransferase MNN2                   | 5                  | 5               | Golgi                             | N-terminal helix (type II)        | Cytoplasm                         | Lumen                             | Lumen                             |
|               | P38264      | SpfBef only    | SRP-independent targeting protein 3                  | 5                  | 5               | ER & Mitochondria                 | N-terminal helix                  | Lumen                             | Cytoplasm                         | Cytoplasm                         |
|               | P37299      | SpfBef only    | Cytochrome b-c1 complex subunit 10                   | 4                  | 4               | Mitochondrial inner membrane      | Helix at residues 22-45 out of 77 | Mitochondrial matrix              | Mitochondrial intermembrane space | Equal                             |
|               | P38212      | SpfBef only    | Protein RCR1                                         | 4                  | 4               | ER                                | N-terminal helix                  | Lumen                             | Cytoplasm                         | Cytoplasm                         |
|               | P38736      | SpfBef only    | Golgi SNAP receptor complex member 1                 | 4                  | 4               | Golgi                             | C-terminal TA-helix               | Cytoplasm                         | Lumen                             | Cytoplasm                         |
|               | P47124      | SpfBef only    | Putative glycosyltransferase HOC1                    | 4                  | 4               | Golgi                             | N-terminal helix (type II)        | Cytoplasm                         | Lumen                             | Lumen                             |
|               | P31755      | SpfBef only    | Initiation-specific alpha-1,6-mannosyltransferase    | 3                  | 3               | ER & Golgi                        | N-terminal helix (type II)        | Cytoplasm                         | Lumen                             | Lumen                             |
| P38288        | SpfBef only | Protein TOS1   | 3                                                    | 3                  | Secreted        | N-terminal signal peptide helix   | Cytoplasm                         | Extracellular space               | Extracellular space               |                                   |

|                      |        |                |                                                           |    |    |                              |    |                                   |                      |
|----------------------|--------|----------------|-----------------------------------------------------------|----|----|------------------------------|----|-----------------------------------|----------------------|
| Multiple TM proteins | P25297 | More in SpfBef | Inorganic phosphate transporter PHO84                     | 24 | 24 | Membrane                     | 12 | Cytoplasm                         | Cytoplasm            |
|                      | Q03648 | More in SpfBef | Uncharacterized protein YMR209C                           | 24 | 24 | Membrane                     | 2  | Unknown                           | Unknown              |
|                      | P40098 | More in SpfBef | Uncharacterized mitochondrial membrane protein FMP10      | 16 | 16 | Mitochondria                 | 2  | Unknown                           | Unknown              |
|                      | P32784 | SpfBef only    | Glycerol-3-phosphate O-acyltransferase 1                  | 10 | 10 | ER                           | 5  | Lumen                             | Cytoplasm            |
|                      | P38325 | More in SpfBef | Mitochondrial outer membrane protein OM14                 | 8  | 8  | Mitochondrial outer membrane | 2  | Unknown                           | Unknown              |
|                      | P39952 | SpfBef only    | Mitochondrial inner membrane protein OXA1                 | 8  | 8  | Mitochondrial inner membrane | 5  | Mitochondrial intermembrane space | Mitochondrial matrix |
|                      | Q06169 | SpfBef only    | Peroxisomal membrane protein PEX30                        | 8  | 8  | Peroxisome                   | 4  | Unknown                           | Unknown              |
|                      | P32476 | SpfBef only    | Squalene monooxygenase                                    | 7  | 7  | ER & Microsome               | 2  | Cytoplasm                         | Cytoplasm            |
|                      | Q12029 | SpfBef only    | Probable mitochondrial transport protein FSF1             | 7  | 7  | Mitochondria                 | 4  | Unknown                           | Unknown              |
|                      | P33310 | SpfBef only    | ATP-dependent permease MDL1                               | 7  | 6  | Mitochondrial inner membrane | 5  | Unknown                           | Unknown              |
|                      | P52867 | SpfBef only    | Dolichyl-phosphate-mannose--protein mannosyltransferase 5 | 6  | 6  | ER                           | 10 | Lumen                             | Lumen                |
|                      | Q99297 | SpfBef only    | Mitochondrial 2-oxodicarboxylate carrier 2                | 6  | 6  | Mitochondrial inner membrane | 6  | Unknown                           | Unknown              |
|                      | P47190 | SpfBef only    | Dolichyl-phosphate-mannose--protein mannosyltransferase 3 | 6  | 4  | ER                           | 9  | Cytoplasm                         | Lumen                |
|                      | P32564 | SpfBef only    | Protein SCM4                                              | 5  | 5  | Membrane                     | 4  | Unknown                           | Unknown              |
|                      | P47818 | SpfBef only    | Protein CCC1                                              | 5  | 5  | Golgi & Vacuole              | 5  | Cytoplasm                         | Lumen                |
|                      | P53337 | SpfBef only    | ER-derived vesicles protein ERV29                         | 5  | 5  | ER                           | 4  | Cytoplasm                         | Cytoplasm            |
|                      | Q03713 | SpfBef only    | Respiratory supercomplex factor 1                         | 5  | 5  | Mitochondria                 | 5  | Mitochondrial intermembrane space | Mitochondrial matrix |
|                      | P31382 | SpfBef only    | Dolichyl-phosphate-mannose--protein mannosyltransferase 2 | 5  | 3  | ER                           | 9  | Cytoplasm                         | Lumen                |

|        |             |                                                  |   |   |                     |    |           |           |
|--------|-------------|--------------------------------------------------|---|---|---------------------|----|-----------|-----------|
| P36051 | SpfBef only | GPI ethanolamine phosphate transferase 1         | 4 | 4 | ER, Golgi & Vacuole | 15 | Cytoplasm | Lumen     |
| Q12144 | SpfBef only | Pore and endoplasmic reticulum protein of 33 kDa | 4 | 4 | ER & Nucleus        | 6  | Cytoplasm | Cytoplasm |
| P19145 | SpfBef only | General amino-acid permease GAP1                 | 3 | 3 | Cell membrane & ER  | 12 | Cytoplasm | Cytoplasm |
| P25560 | SpfBef only | Protein RER1                                     | 3 | 3 | Golgi               | 2  | Cytoplasm | Cytoplasm |

2 **Supplementary Table 3. List of proteins that were either identified exclusively in CtSpf1/BeF3<sup>-</sup>, or among the 20 most overrepresented in**  
3 **CtSpf1/BeF3<sup>-</sup> relative to the GFP/BeF3<sup>-</sup> control, in the MS analysis.** The table has been divided into proteins with 1 vs multiple TM helices and  
4 sorted by number of peptide hits.

## 5 **Supplementary References**

- 6 1 Bozzi, A. T. *et al.* Structures in multiple conformations reveal distinct transition metal and proton  
7 pathways in an Nramp transporter. *Elife* **8**, doi:10.7554/eLife.41124 (2019).
- 8 2 Wiuf, A. *et al.* The two-domain elevator-type mechanism of zinc-transporting ZIP proteins. *Sci*  
9 *Adv* **8**, eabn4331, doi:10.1126/sciadv.abn4331 (2022).
- 10 3 Salustros, N. *et al.* Structural basis of ion uptake in copper-transporting P(1B)-type ATPases. *Nat*  
11 *Commun* **13**, 5121, doi:10.1038/s41467-022-32751-w (2022).
